# Supplementary material for: From “S” to “O”: experimental and theoretical insights into the atmospheric degradation mechanism of dithiophosphinic acids
Source: Royal Society of Chemistry journal article supplement (doi:10.1039/d0ra08841b), 2020-01-01
Supplement: d0ra08841b1.pdf [file d0ra08841b1.pdf]

## Supporting Information

### From “S” to “O”: Experimental and Theoretical Insights into the Atmospheric Degradation Mechanism of Dithiophosphinic Acids

Zhipeng Wang,<sup>‡a</sup> Yixiang Zhang,<sup>‡b</sup> Jingjing Liu,<sup>b</sup> Lianjun Song,<sup>a</sup> Xueyu Wang,<sup>a</sup>  
Xiuying Yang,<sup>a</sup> Chao Xu,<sup>c</sup> Jun Li<sup>\*b</sup> Songdong Ding<sup>\*a</sup>

[a] College of Chemistry, Sichuan University, Chengdu 610064 (China)

[b] Department of Chemistry and Key Laboratory of Organic Optoelectronics,  
Molecular Engineering of the Ministry of Education, Tsinghua University, Beijing  
100084 (China)

[c] Collaborative Innovation Center of Advanced Nuclear Energy Technology,  
Institute of Nuclear and New Energy Technology, Tsinghua University, Beijing  
100084 (China)

<sup>‡</sup> These authors contributed equally to the work.

#### Corresponding Authors

\*E-mail: dsd68@163.com (S. D. Ding)

\*E-mail: junli@tsinghua.edu.cn (J. Li)

## Contents

|                                                                                   |    |
|-----------------------------------------------------------------------------------|----|
| 1. Chemical structure .....                                                       | 2  |
| 2. ESI-MS.....                                                                    | 3  |
| 3. <sup>31</sup> P NMR.....                                                       | 18 |
| 4. FT-IR.....                                                                     | 22 |
| 5. PXRD .....                                                                     | 25 |
| 6. Extraction .....                                                               | 26 |
| 7. Preservation of DPAHs .....                                                    | 29 |
| 8. Theoretical Calculations.....                                                  | 32 |
| Cartesian coordinates for all optimized structures of the stationary points. .... | 36 |

## 1. Chemical structure

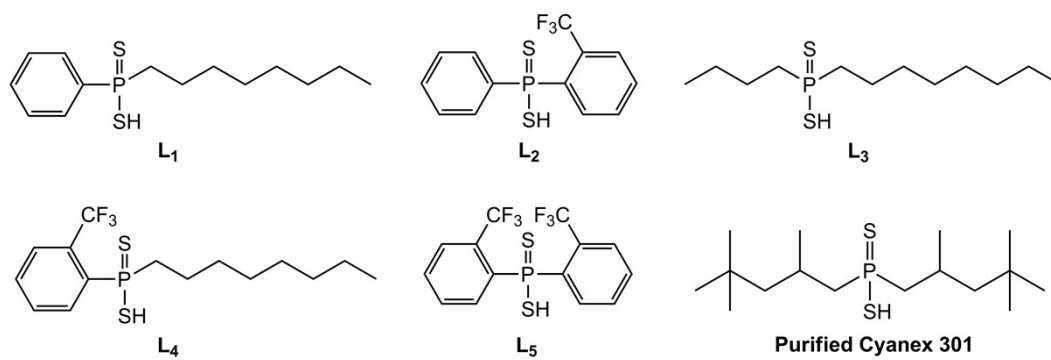

**Figure S1.** Chemical structures of DPAHs.

## 2. ESI-MS

**L<sub>1</sub>**

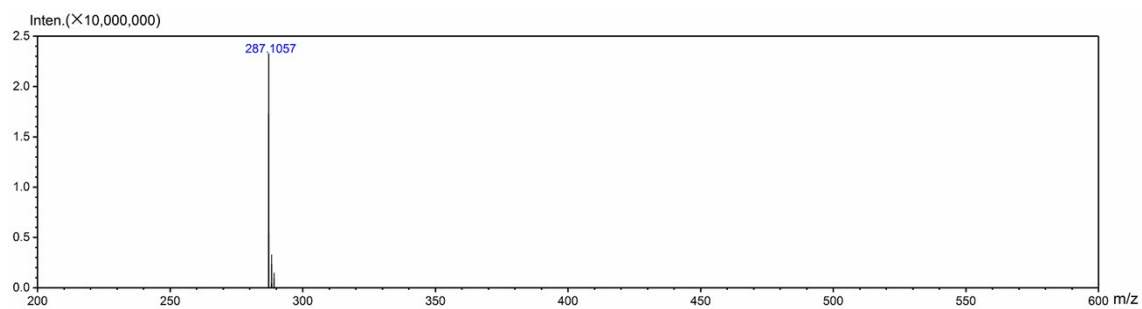

**(a)**

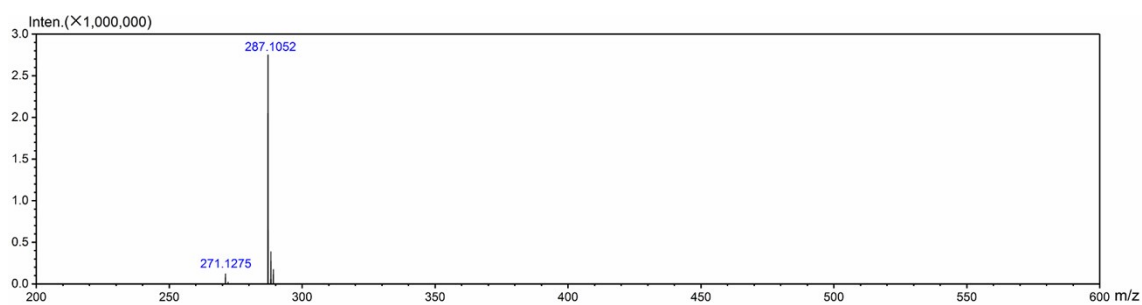

**(b)**

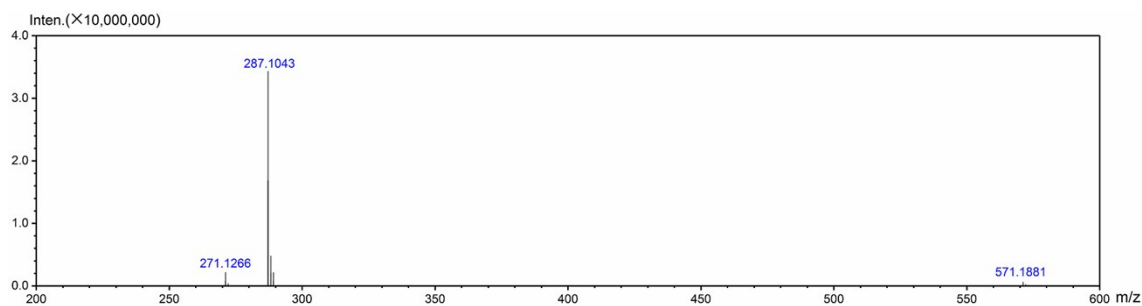

**(c)**

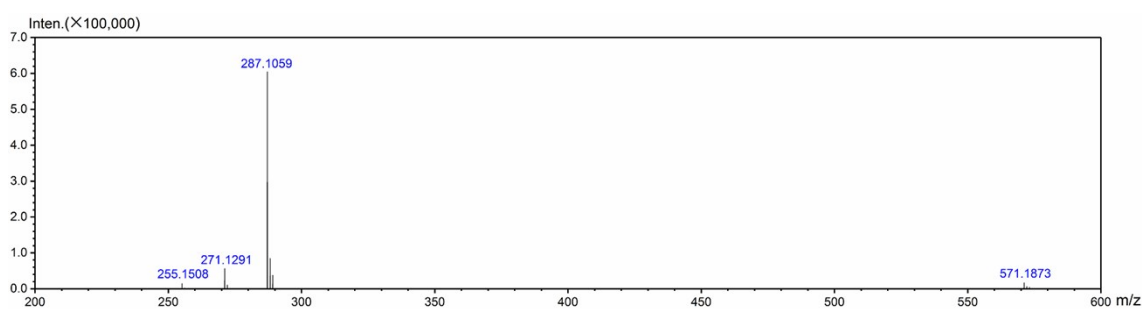

**(d)**

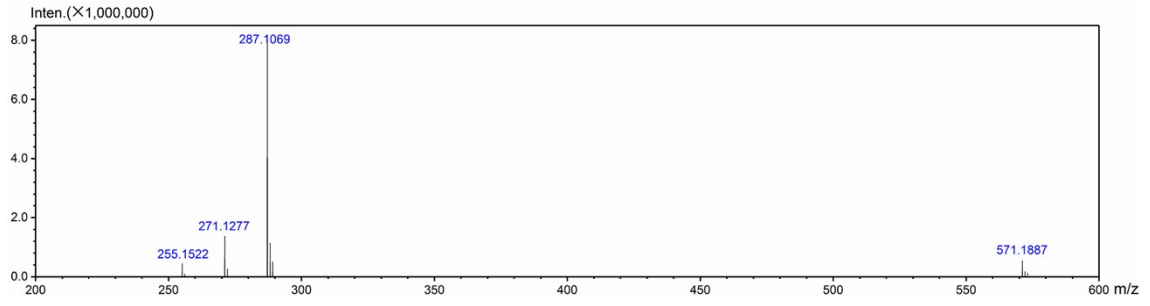

(e)

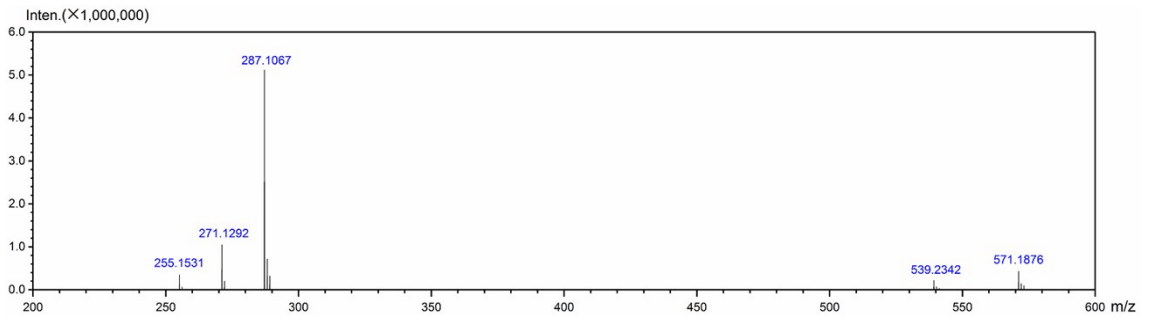

(f)

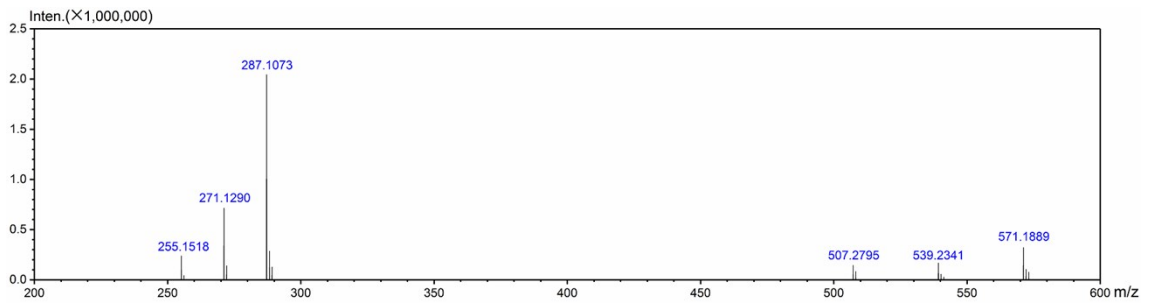

(g)

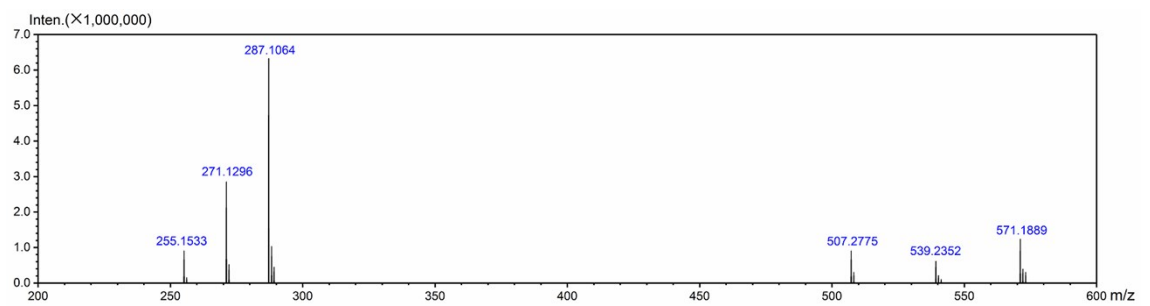

(h)

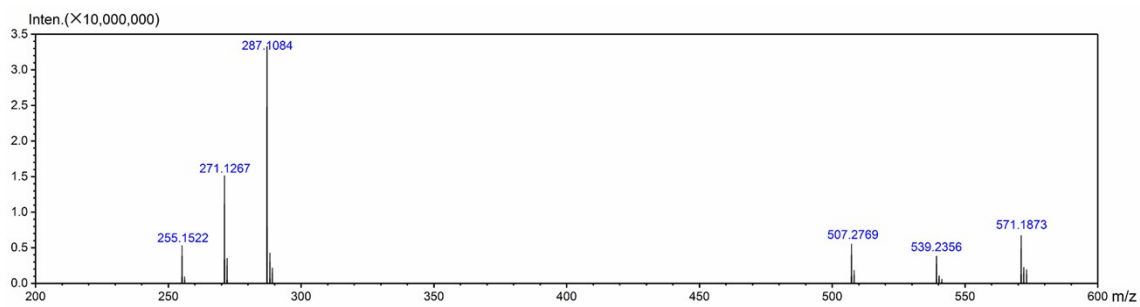

(i)

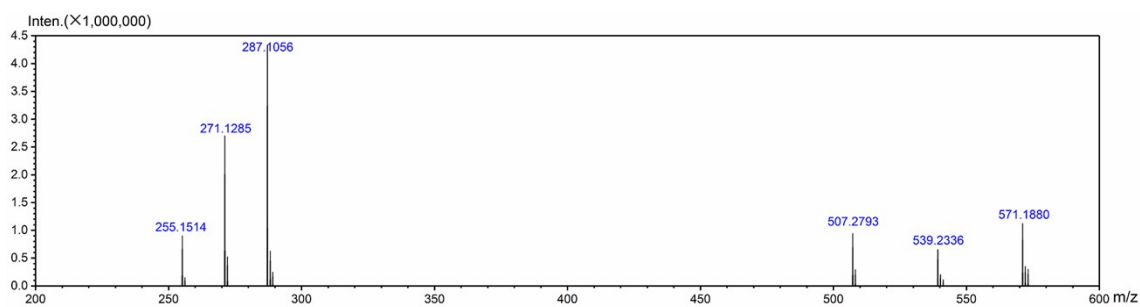

(j)

**Figure S2.** ESI-MS spectra of L<sub>1</sub> at ambient environment for 0d (a); 5d (b); 10d (c); 20d (d); 30d (e); 60d (f); 90d (g); 120d (h); 150d (i); 180d (j).

**L<sub>2</sub>**

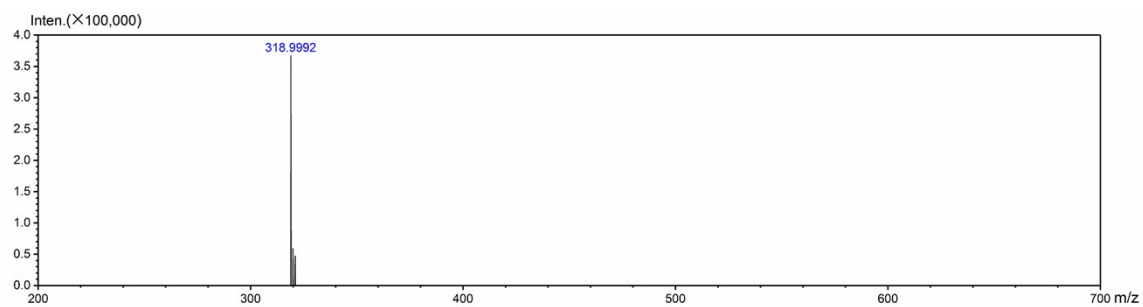

(a)

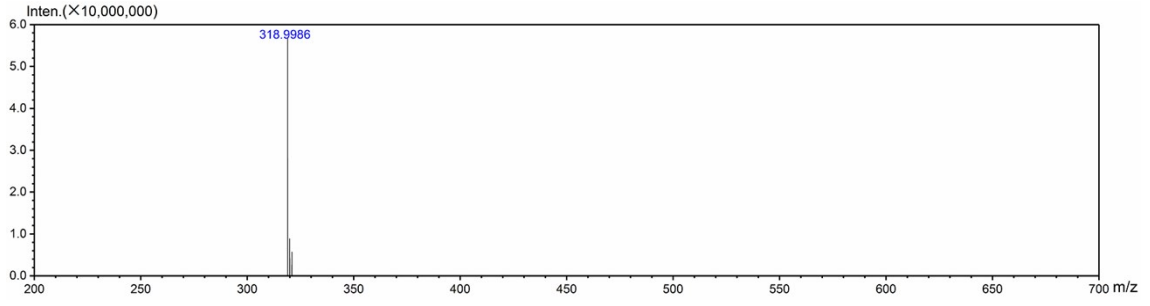

(b)

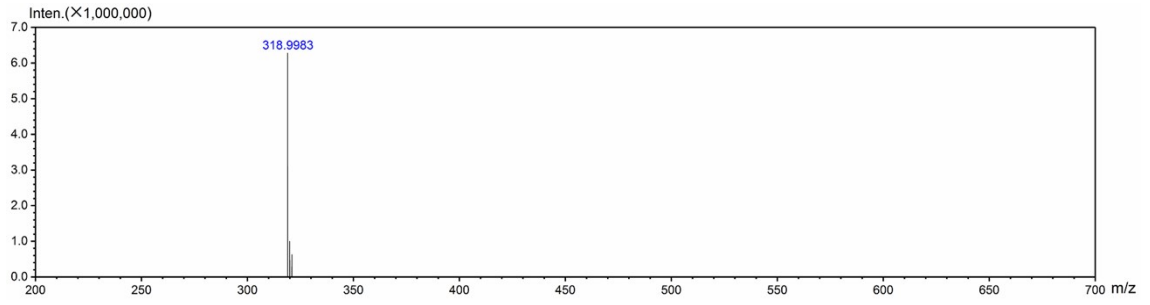

(c)

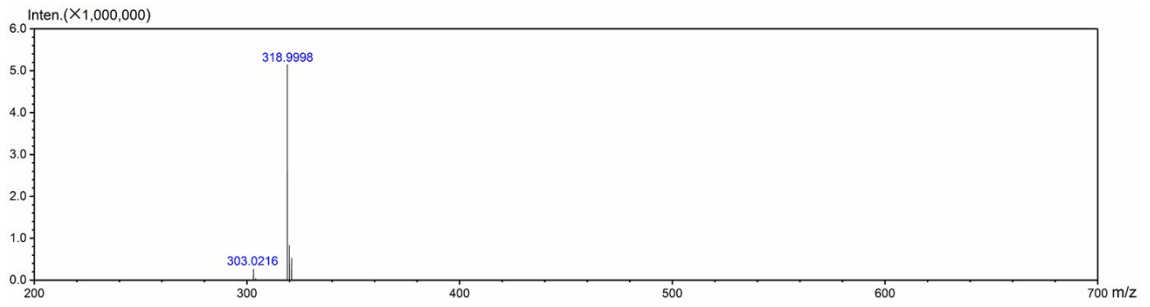

(d)

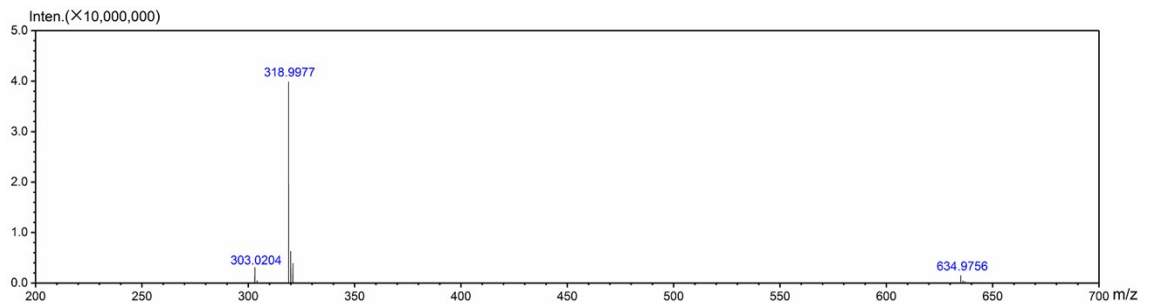

(e)

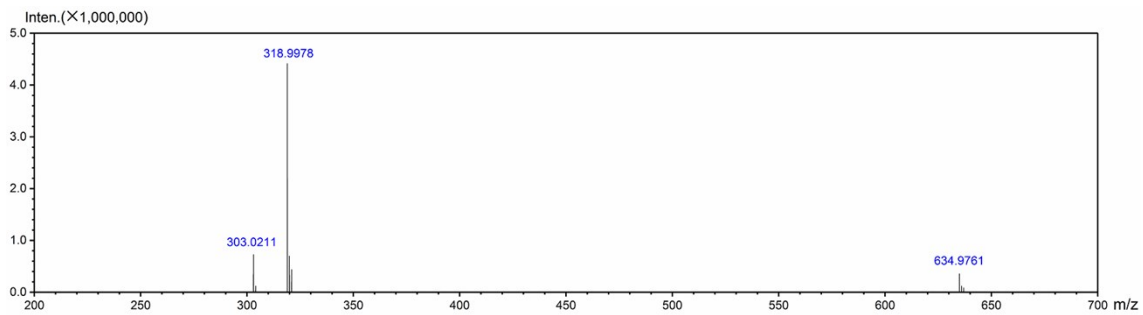

(f)

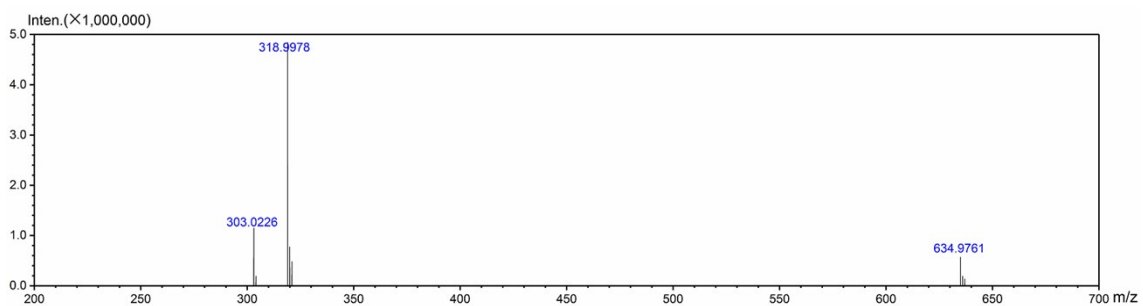

(g)

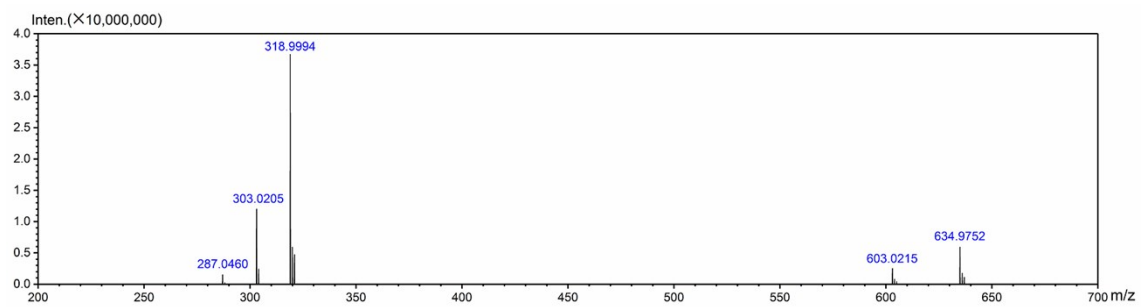

(h)

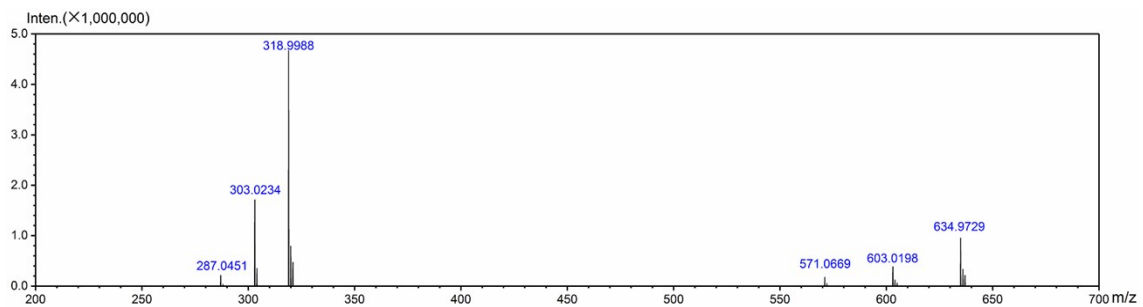

(i)



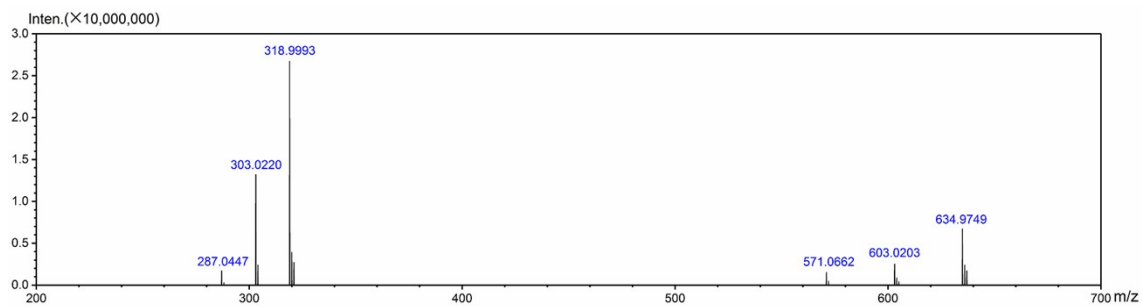

(j)

**Figure S3.** ESI-MS spectra of  $L_2$  at ambient environment for 0d (a); 5d (b); 10d (c); 20d (d); 30d (e); 60d (f); 90d (g); 120d (h); 150d (i); 180d (j).

$L_3$

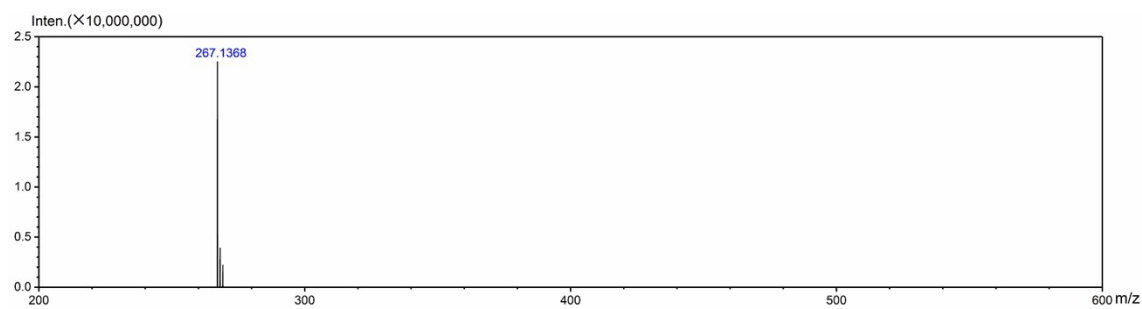

(a)

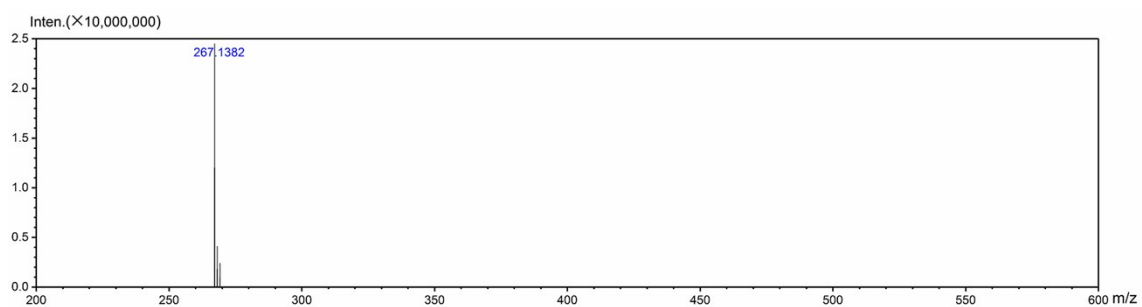

(b)

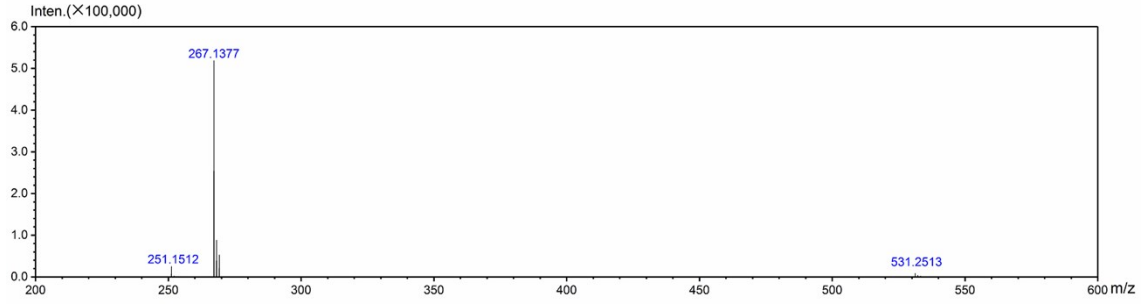

(c)

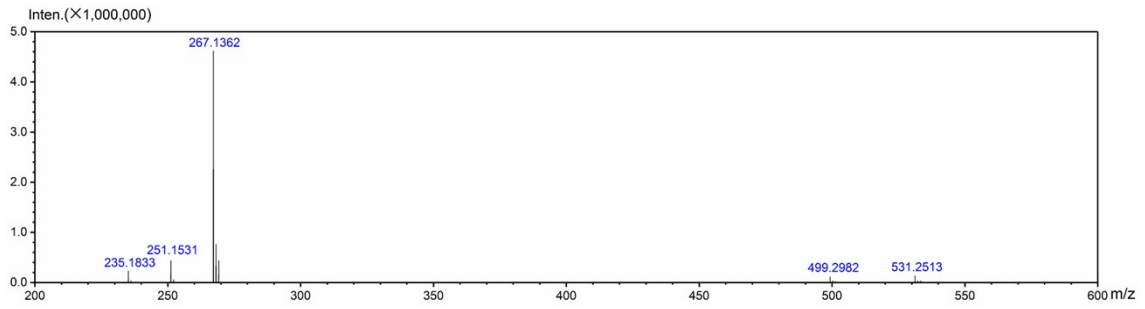

(d)

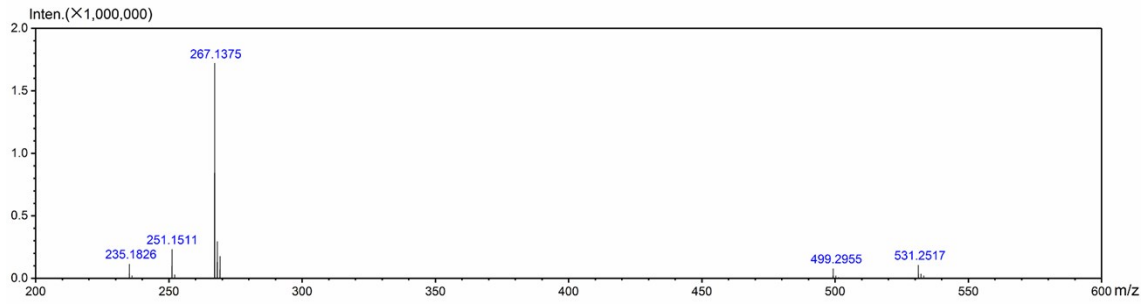

(e)

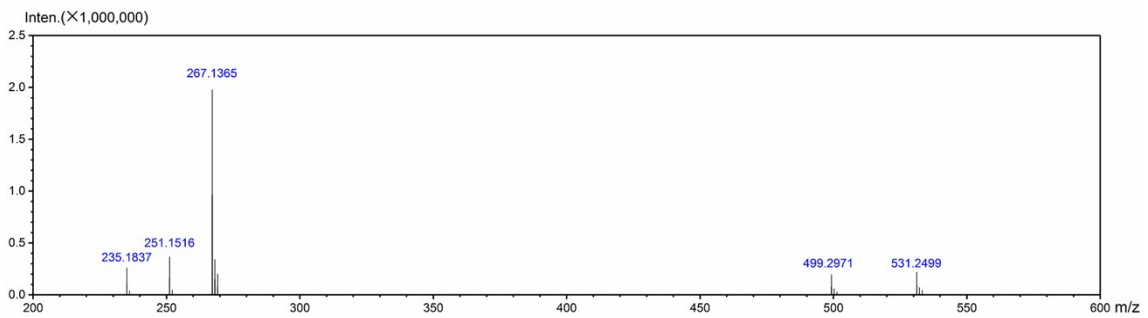

(f)

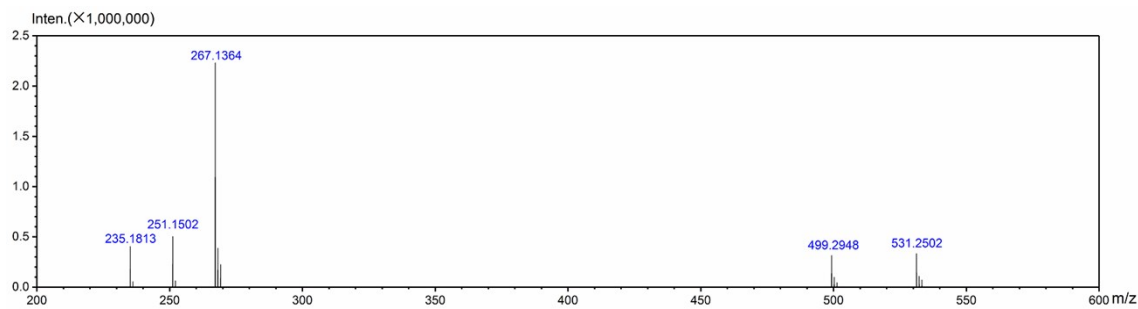

(g)

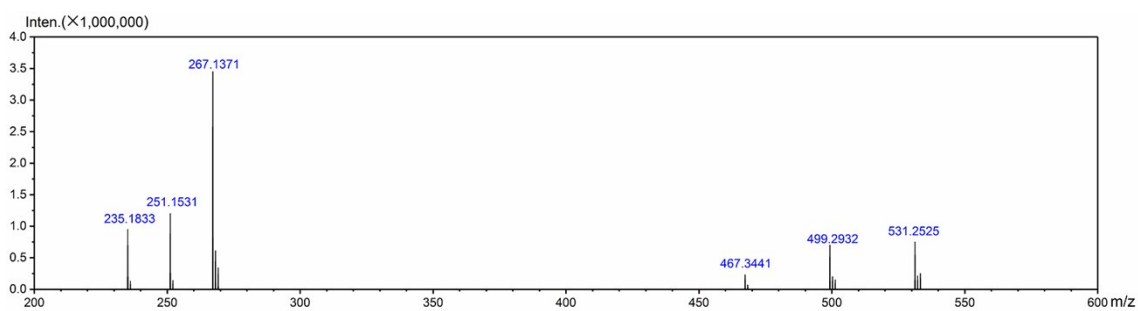

(h)

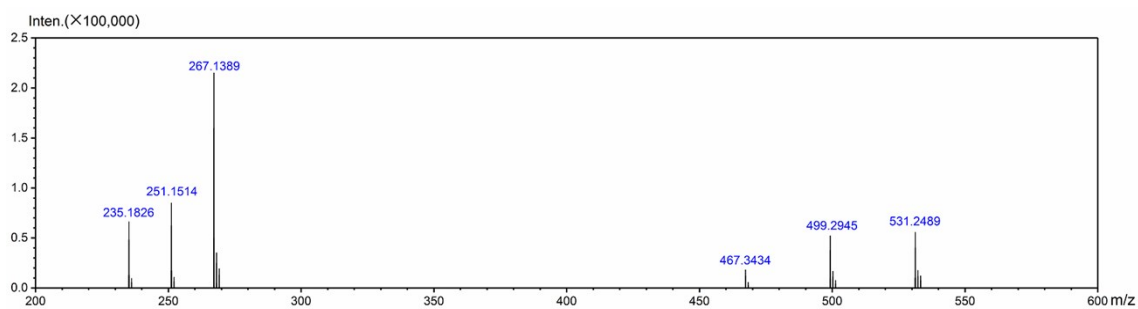

(i)

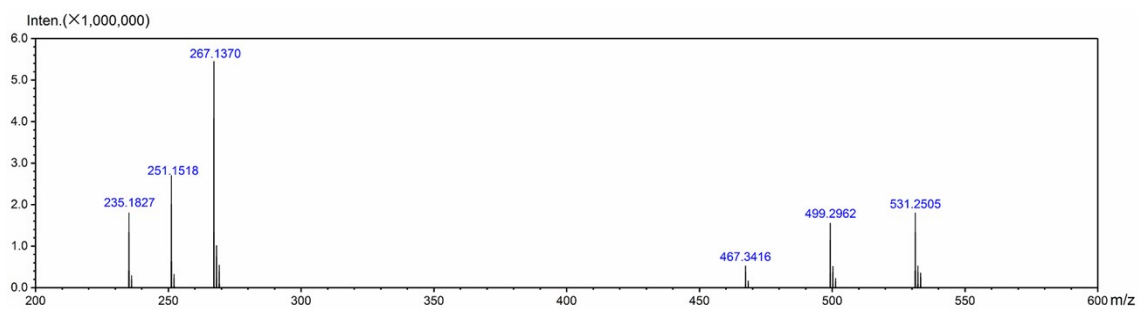

(j)

**Figure S4.** ESI-MS spectra of  $L_3$  at ambient environment for 0d (a); 5d (b); 10d (c); 20d (d); 30d (e); 60d (f); 90d (g); 120d (h); 150d (i); 180d (j).

**L<sub>4</sub>**

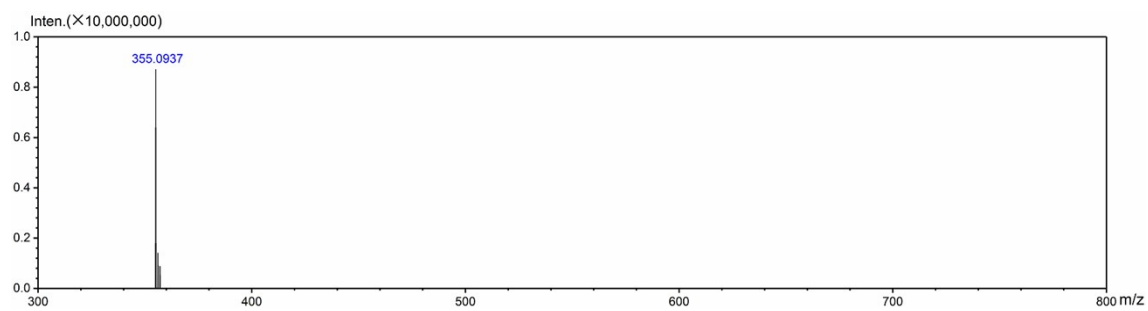

**(a)**

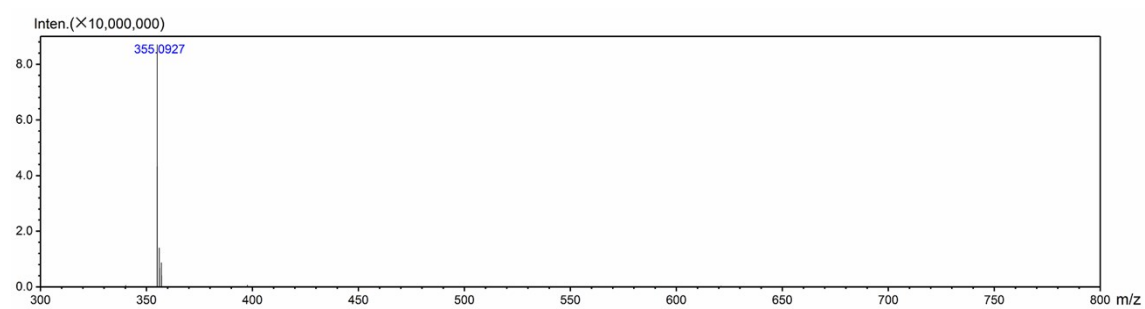

**(b)**

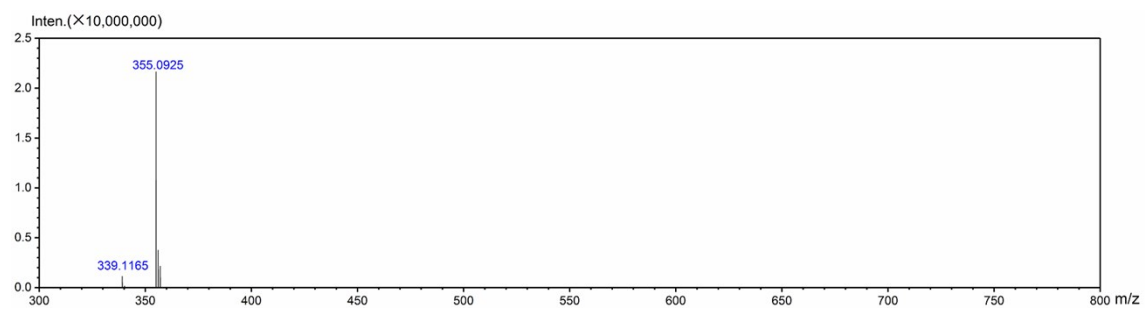

**(c)**

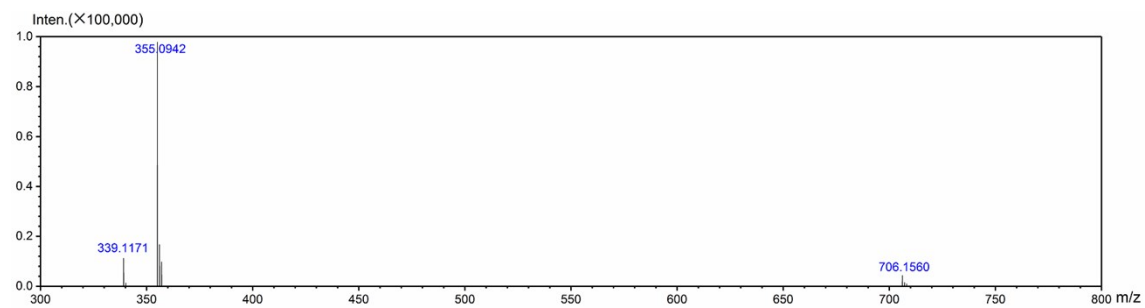

**(d)**

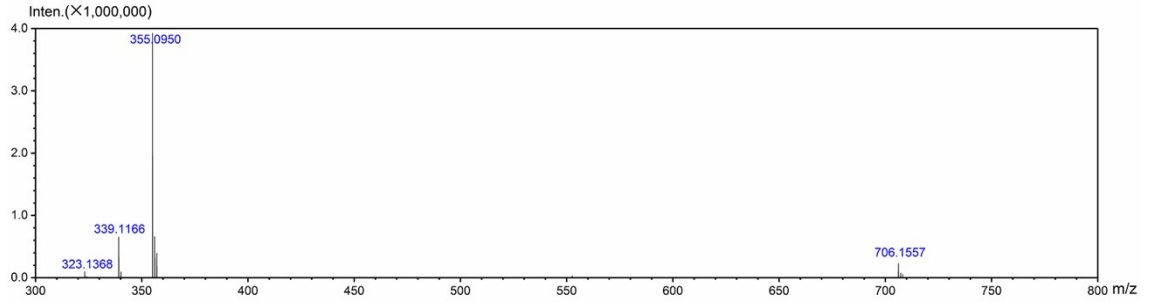

(e)

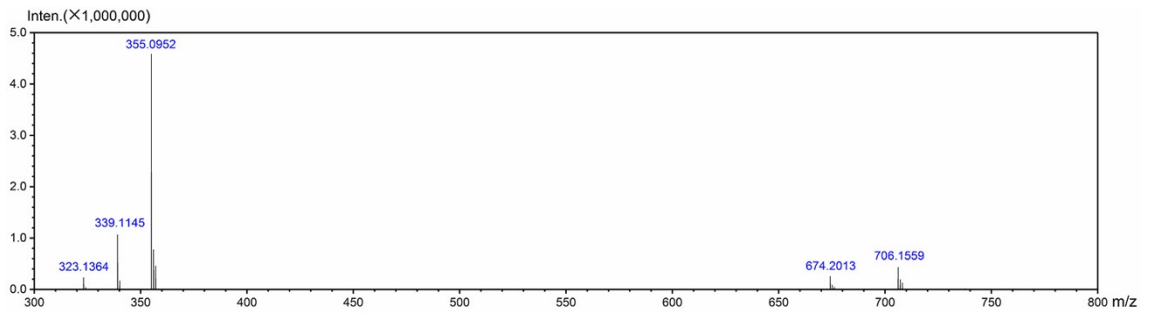

(f)

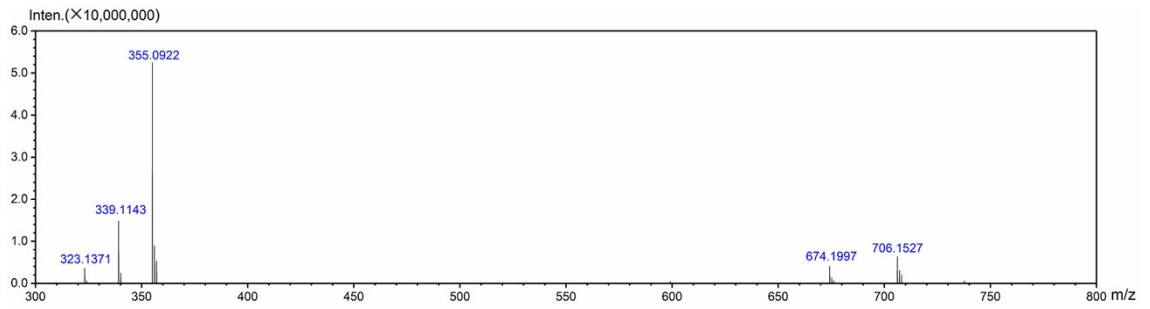

(g)

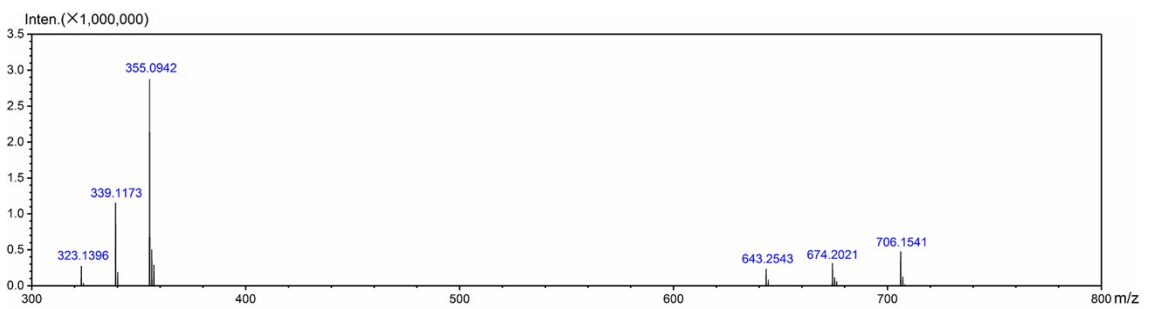

(h)

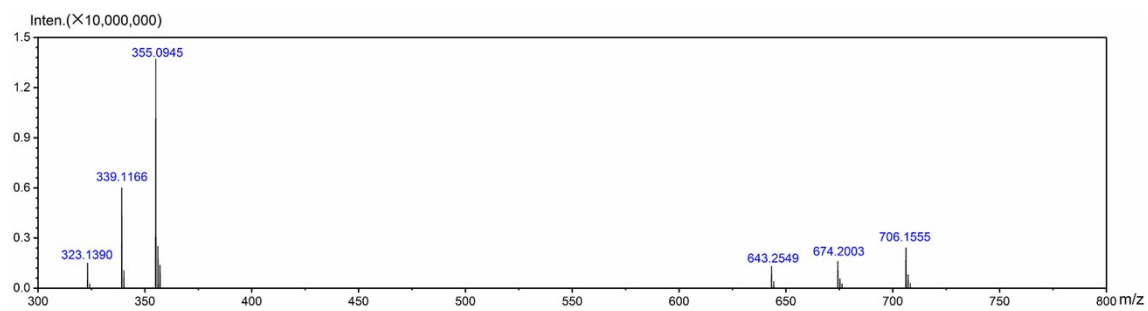

(i)

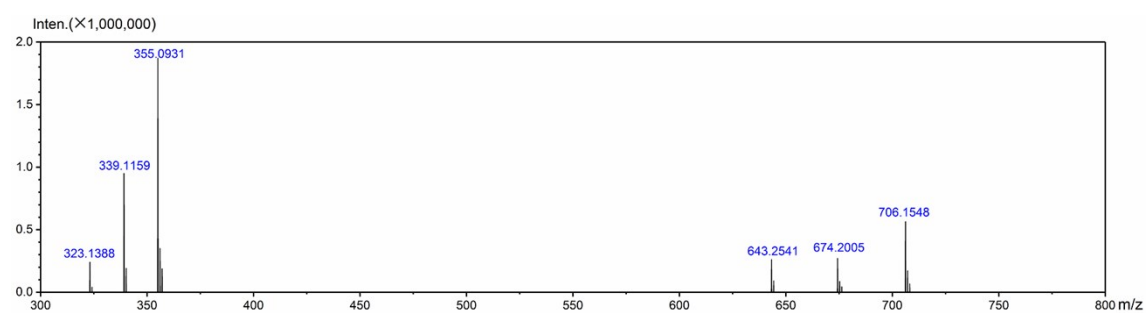

(j)

**Figure S5.** ESI-MS spectra of  $L_4$  at ambient environment for 0d (a); 5d (b); 10d (c); 20d (d); 30d (e); 60d (f); 90d (g); 120d (h); 150d (i); 180d (j).

**$L_5$**

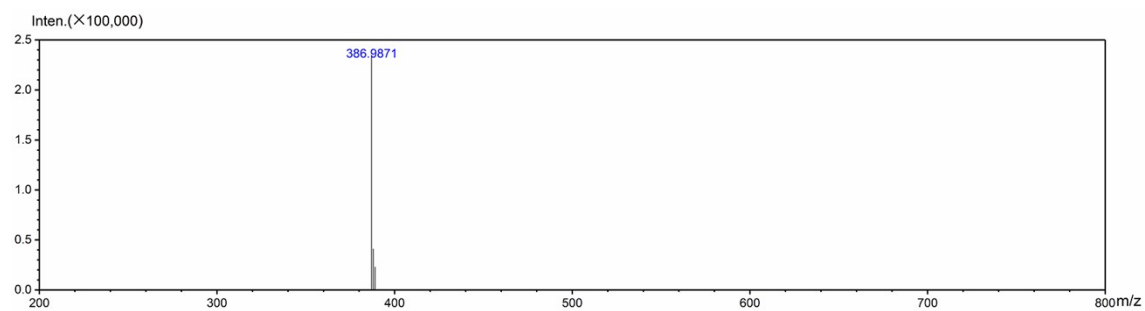

(a)

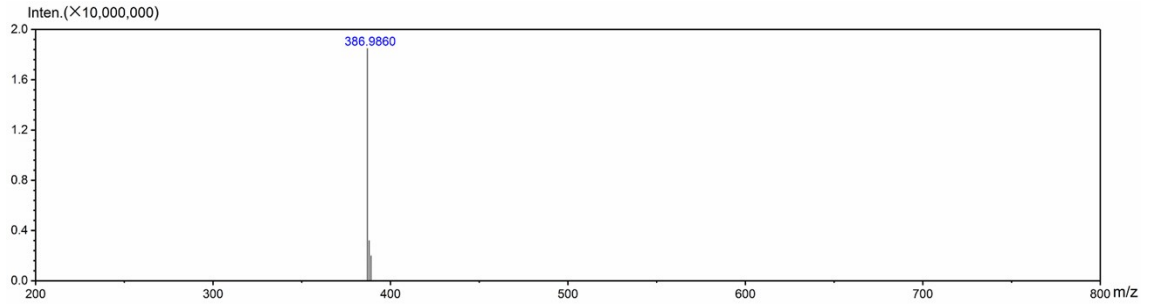

(b)

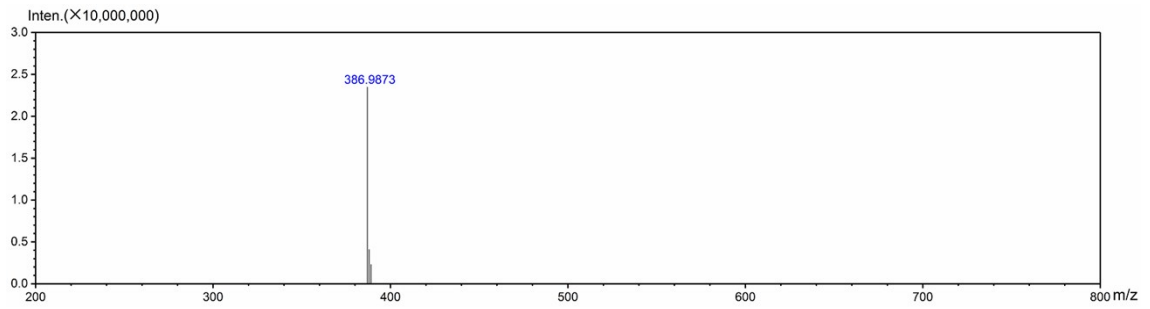

(c)

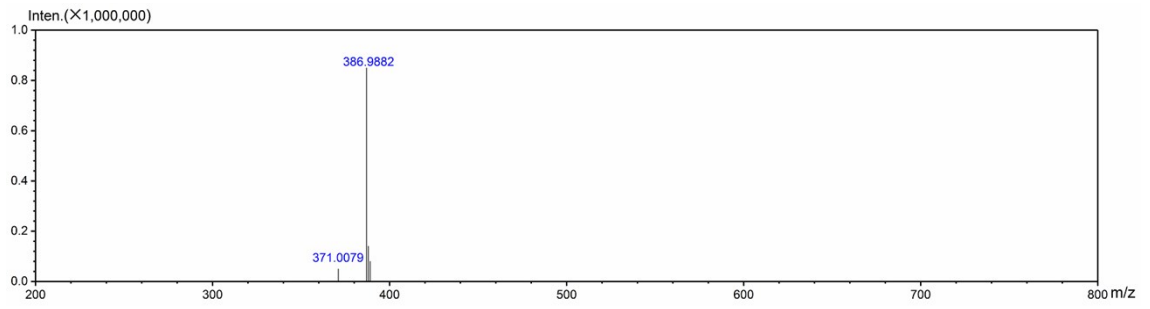

(d)

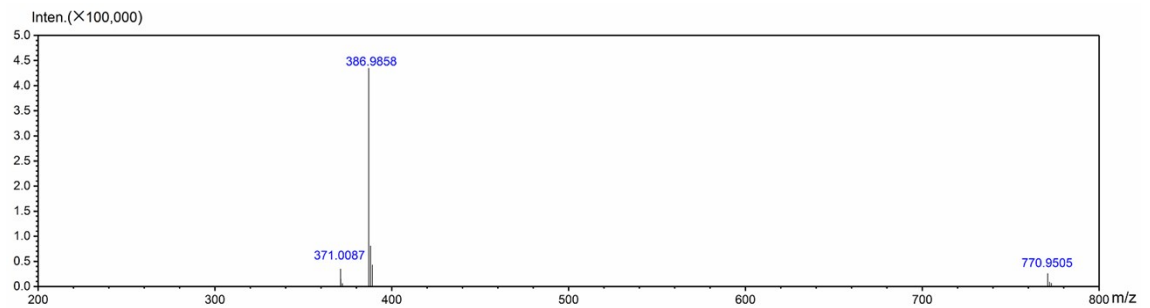

(e)

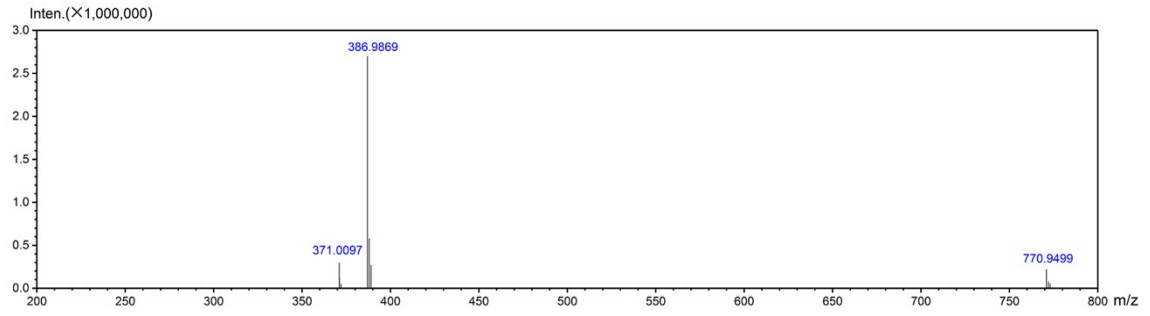

(f)

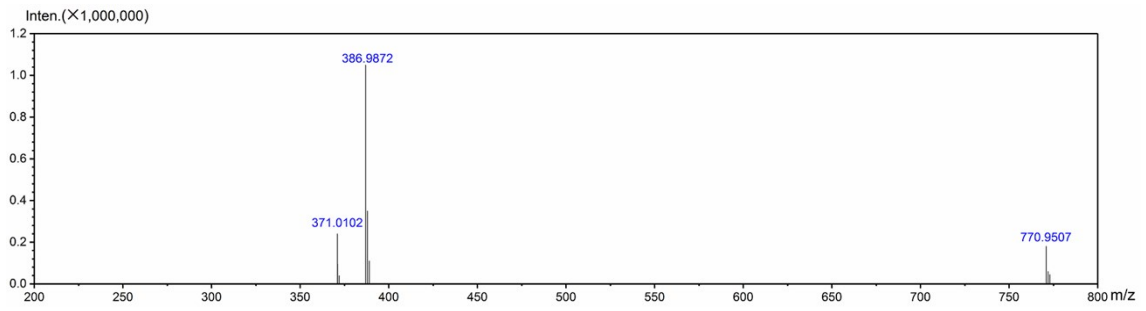

(g)

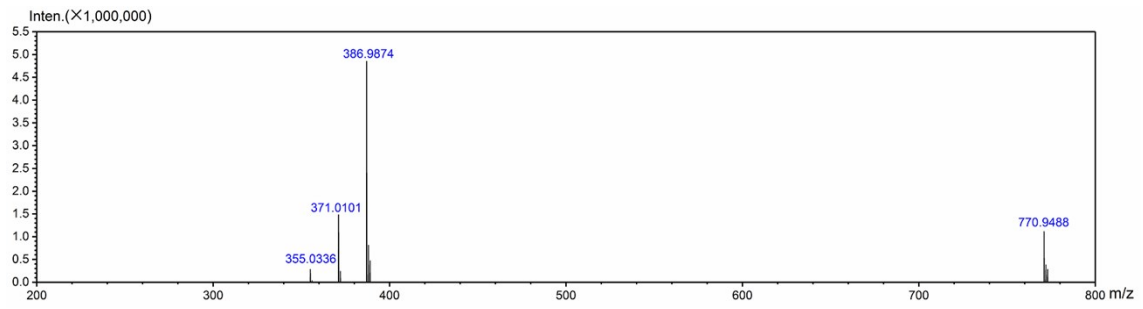

(h)

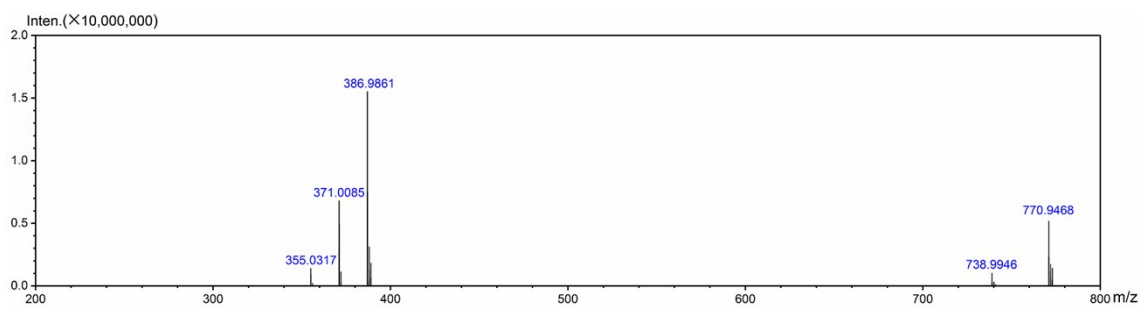

(i)



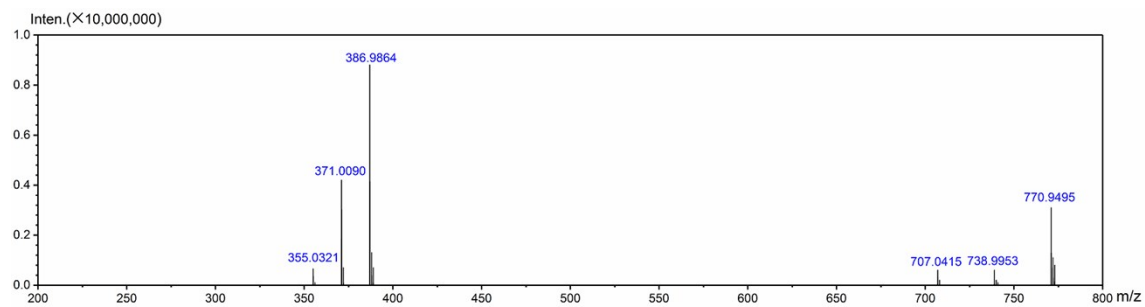

(j)

**Figure S6.** ESI-MS spectra of  $L_5$  at ambient environment for 0d (a); 5d (b); 10d (c); 20d (d); 30d (e); 60d (f); 90d (g); 120d (h); 150d (i); 180d (j).

### 3. $^{31}\text{P}$ NMR

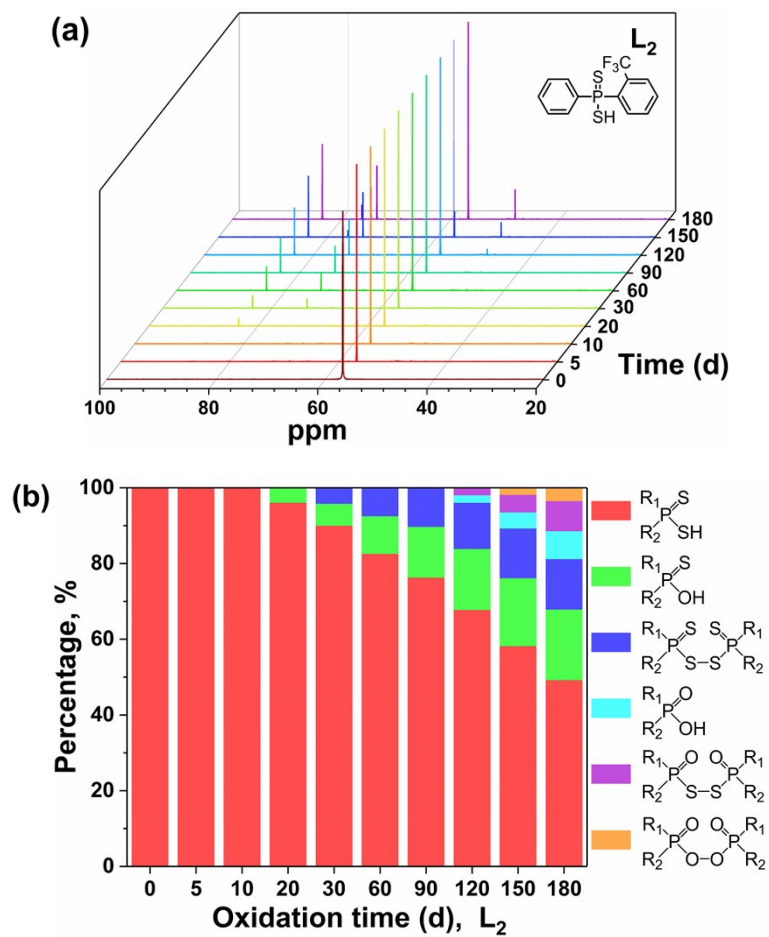

**Figure S7.**  $^{31}\text{P}$  NMR spectra (a) and percentages of oxidation products (b) of  $L_2$  at ambient environment for different oxidation time.

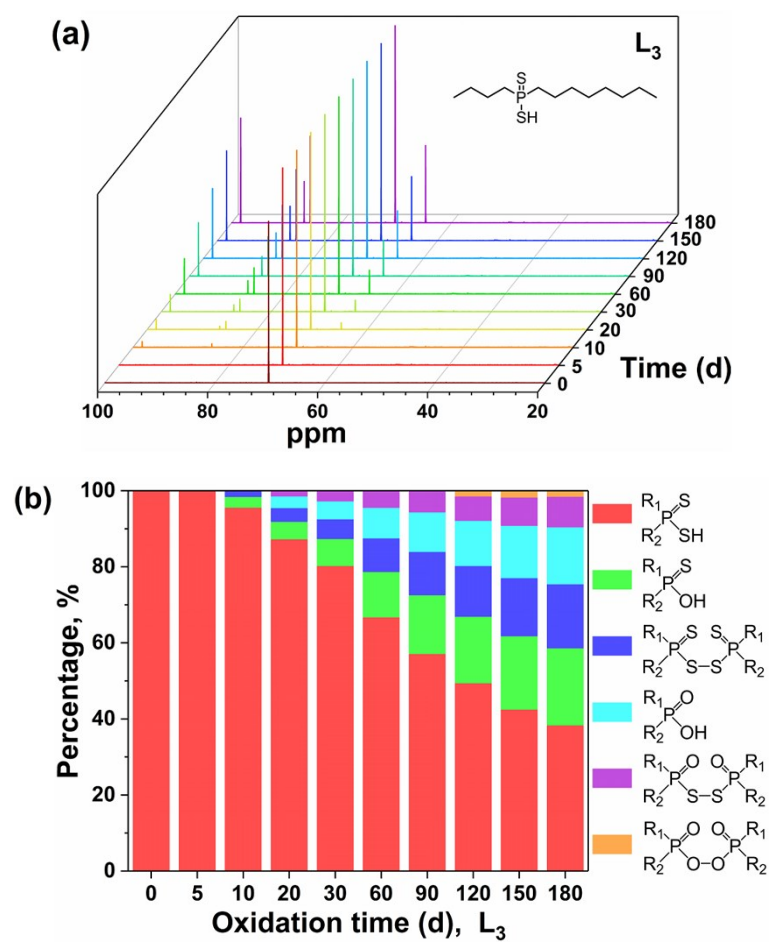

**Figure S8.**  $^{31}\text{P}$  NMR spectra (a) and percentages of oxidation products (b) of  $\text{L}_3$  at ambient environment for different oxidation time.

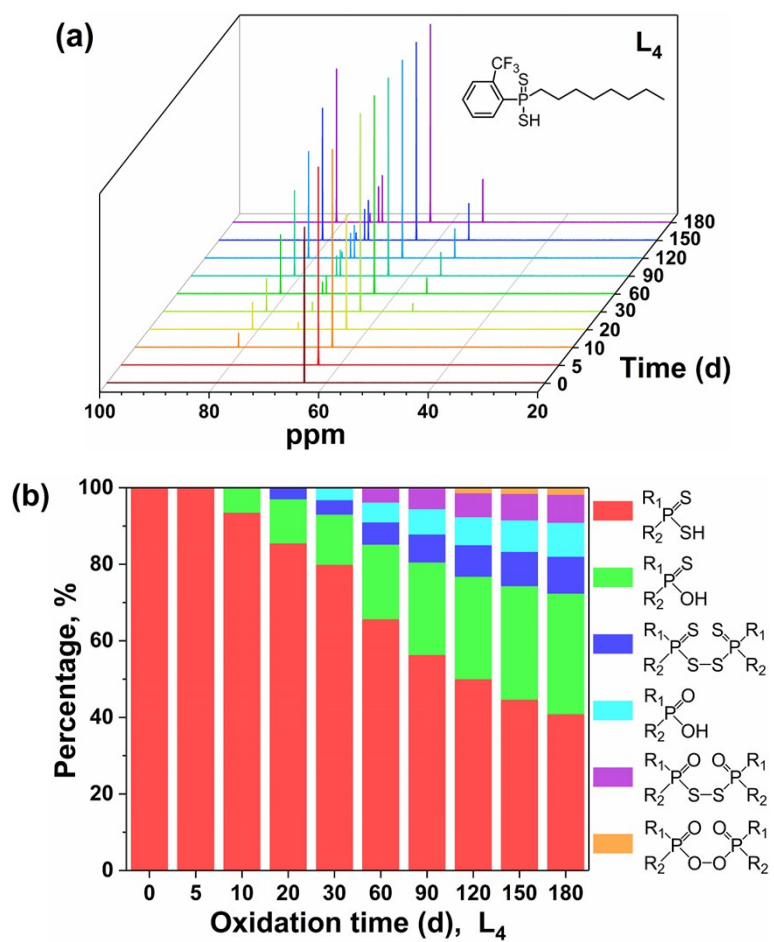

**Figure S9.**  $^{31}P$  NMR spectra (a) and percentages of oxidation products (b) of  $L_4$  at ambient environment for different oxidation time.

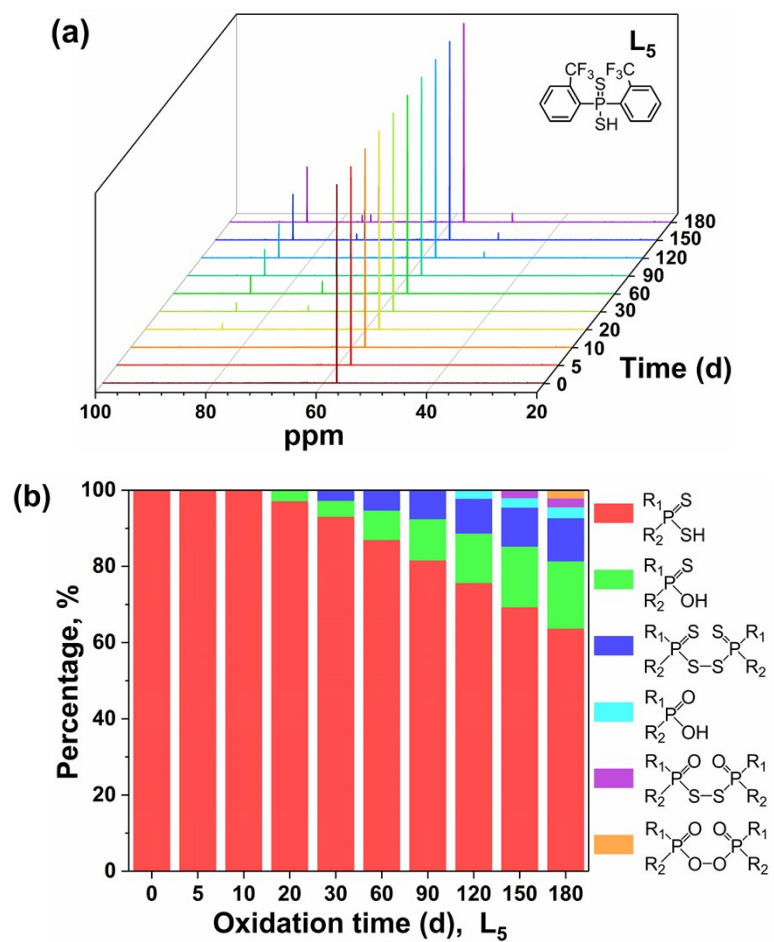

**Figure S10.**  $^{31}\text{P}$  NMR spectra (a) and percentages of oxidation products (b) of  $\text{L}_5$  at ambient environment for different oxidation time.

## 4. FT-IR

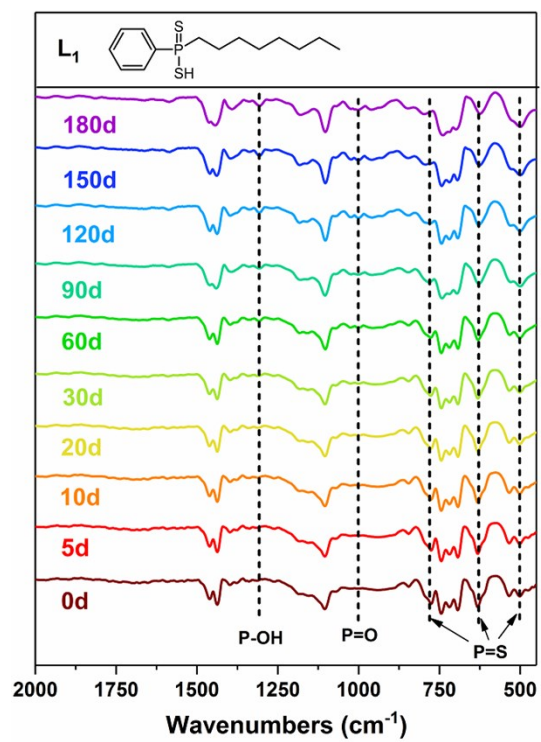

(a)

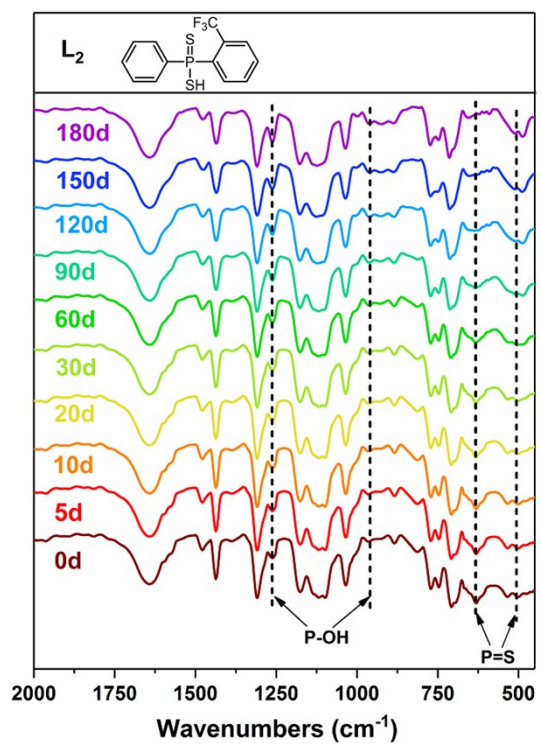

(b)

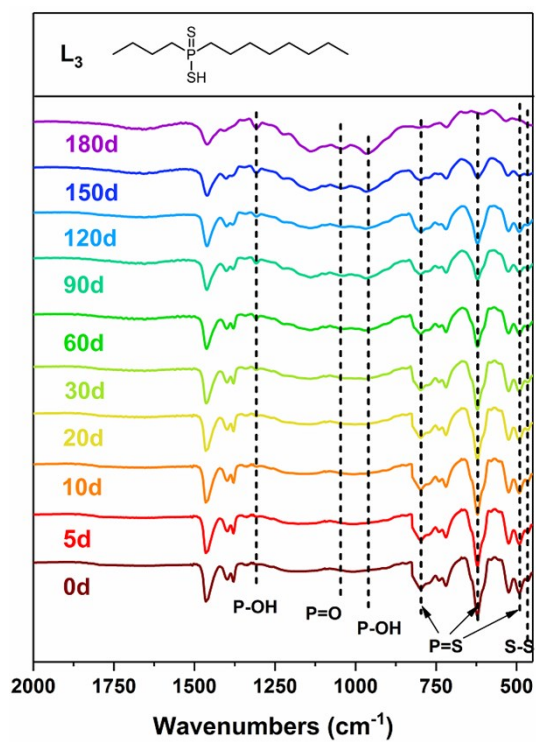

(c)

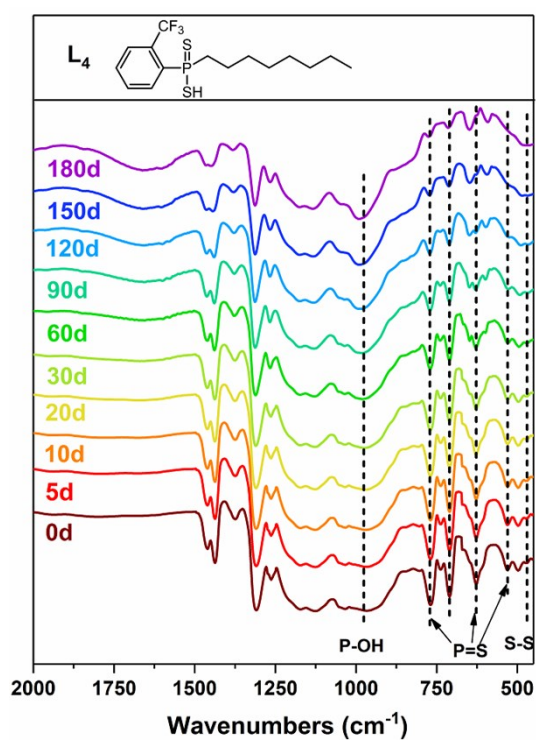

(d)

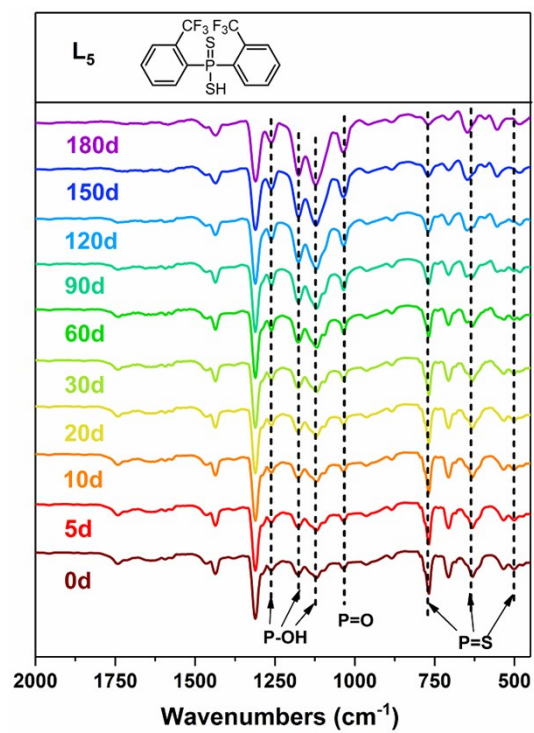

(e)

**Figure S11.** FT-IR spectra of  $L_1$  (a),  $L_2$  (b),  $L_3$  (c),  $L_4$  (d),  $L_5$  (e) at ambient environment for different oxidation time.



## 5. PXRD

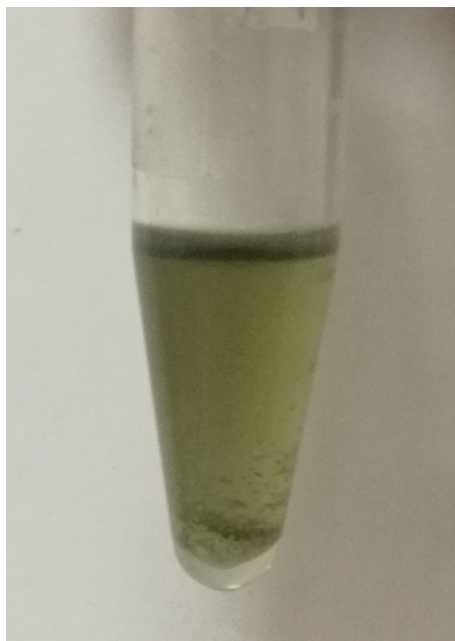

**Figure S12.** Yellow precipitate at the bottom of the sample.

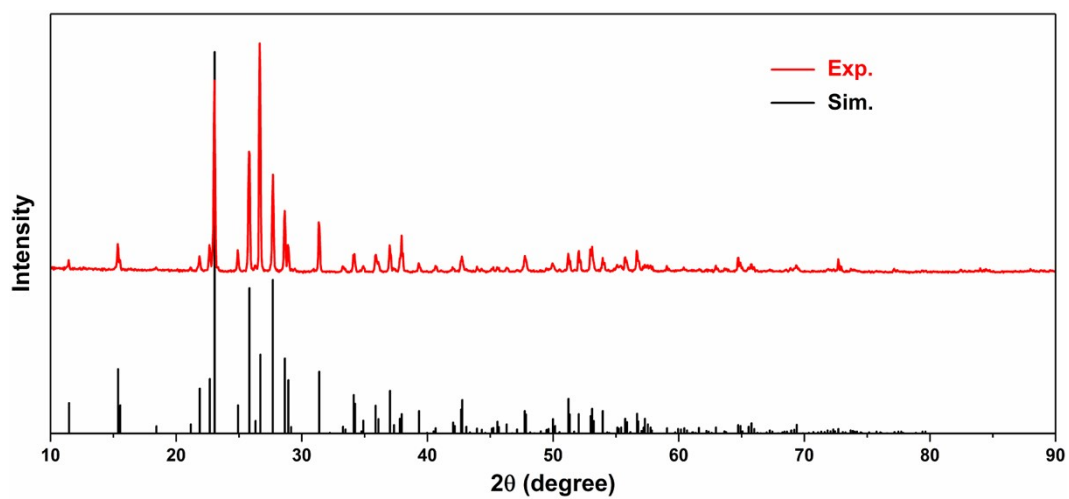

**Figure S13.** Powder X-ray diffraction spectrum of solid oxidation product. (Exp. (**red**) and Sim. (**black**)).

## 6. Extraction

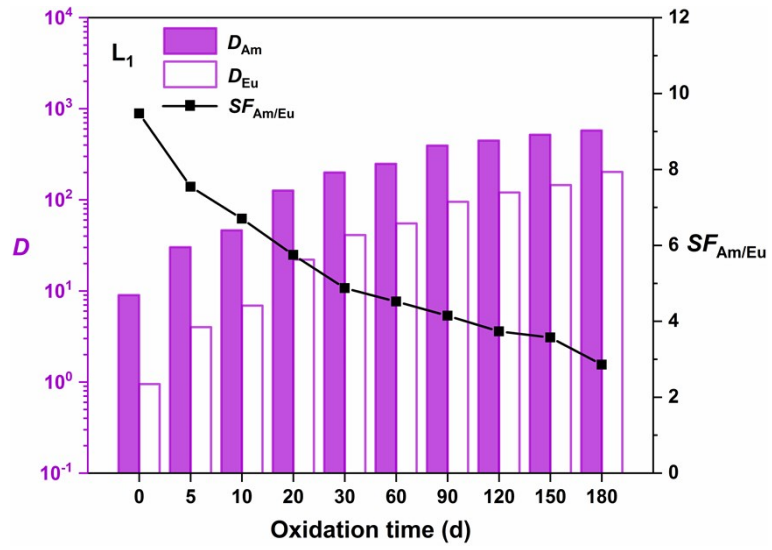

(a)

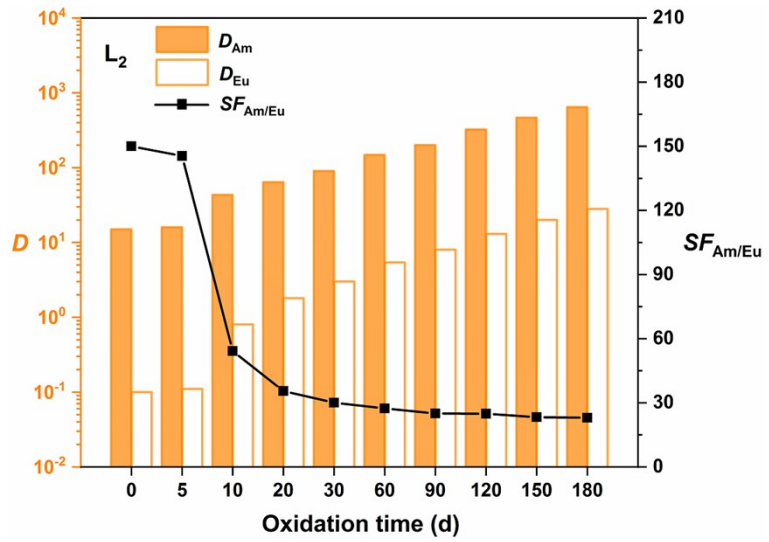

(b)

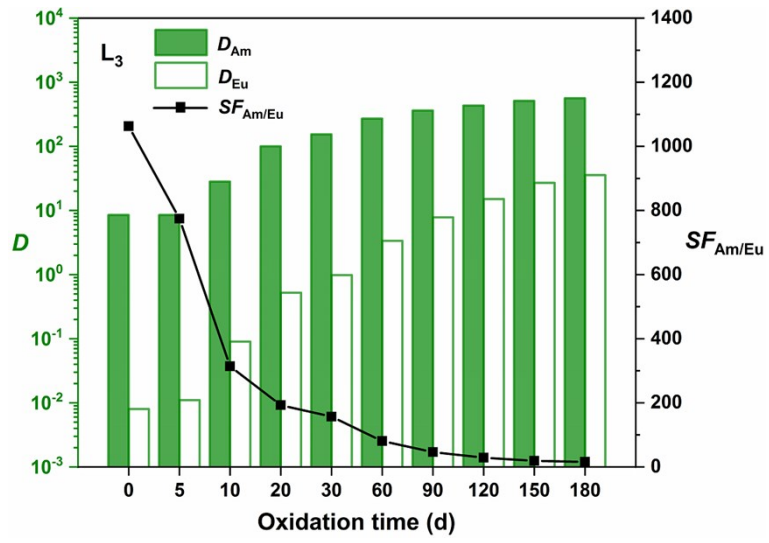

(c)

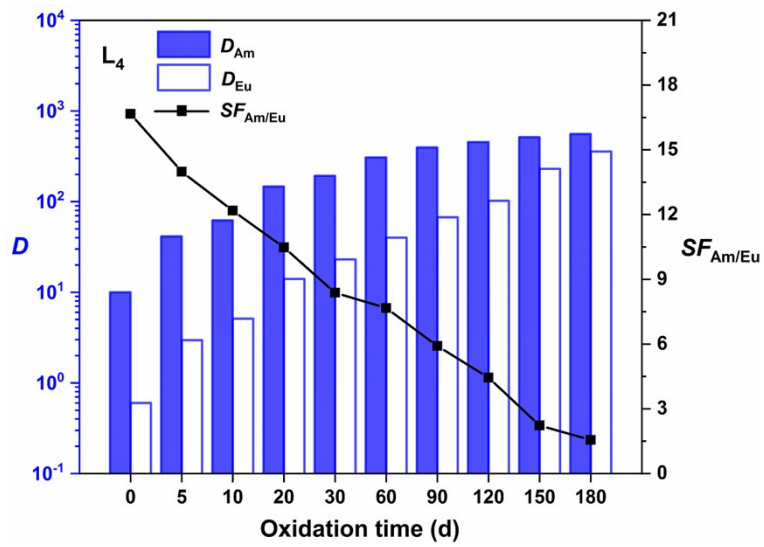

(d)

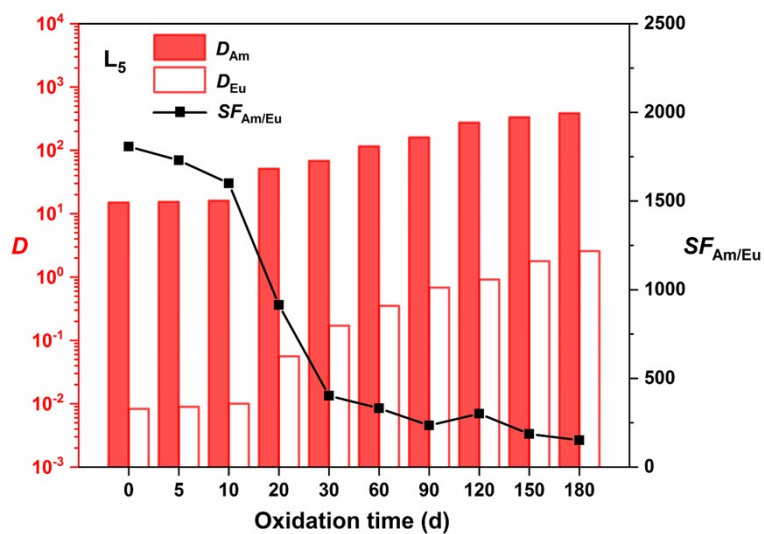

(e)

**Figure S14.** Influence of oxidation time on the extraction of Am<sup>3+</sup> and Eu<sup>3+</sup> by L<sub>1</sub> (a), L<sub>2</sub> (b), L<sub>3</sub> (c), L<sub>4</sub> (d), L<sub>5</sub> (e).

Organic phase: 0.50 mol/L extractant in toluene; Aqueous phase: trace amount of <sup>241</sup>Am<sup>3+</sup>, 200 ppm Eu<sup>3+</sup>, and 1.0 mol/L NaNO<sub>3</sub> with pH 2.50, 2.35, 3.50, 2.80 and 2.00 for L<sub>1</sub>, L<sub>2</sub>, L<sub>3</sub>, L<sub>4</sub>, and L<sub>5</sub>, respectively; Temperature: 25.0 ± 0.5 °C.

## 7. Preservation of DPAHs

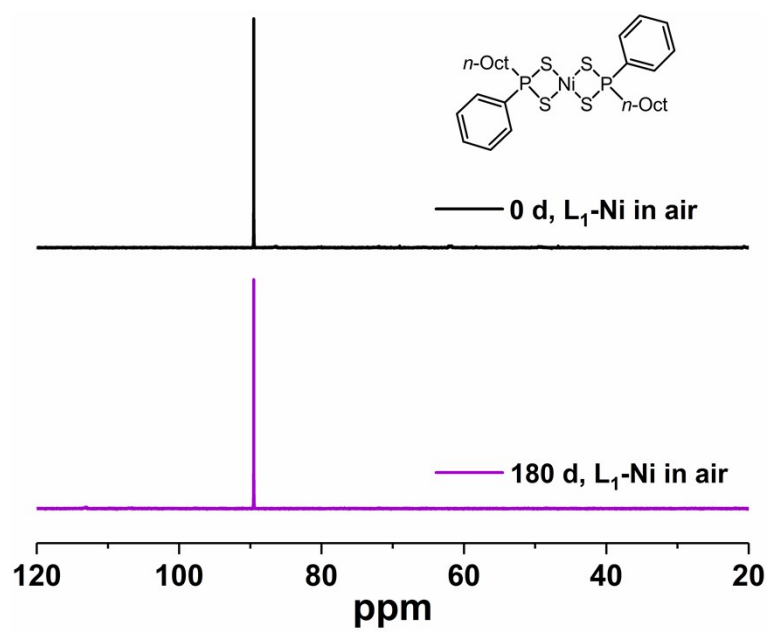

(a)

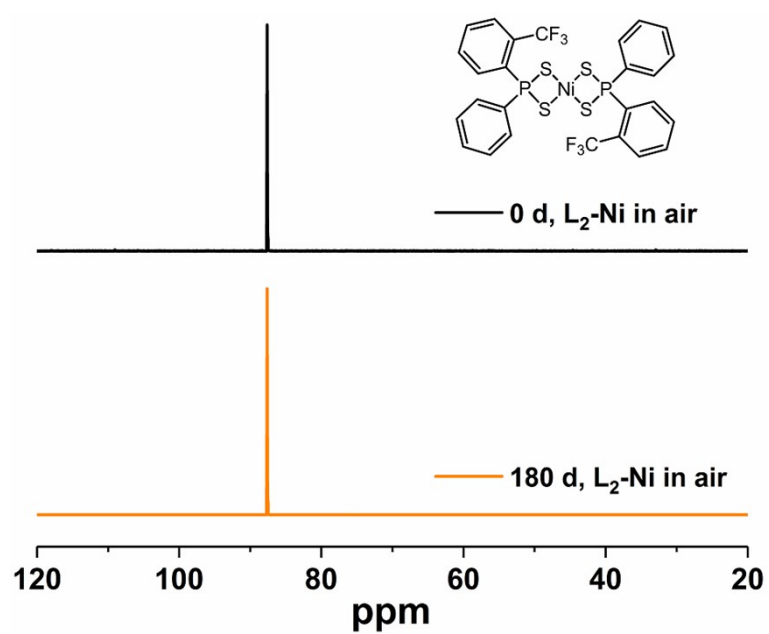

(b)

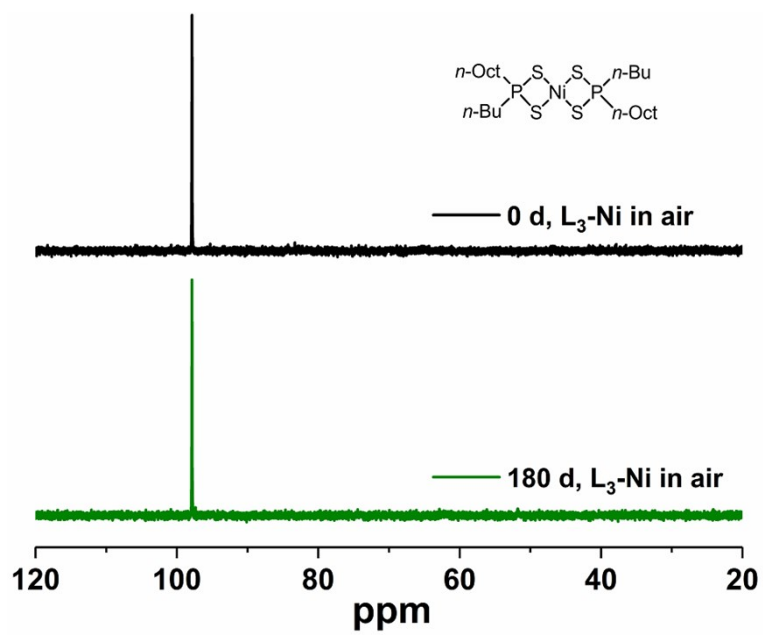

(c)

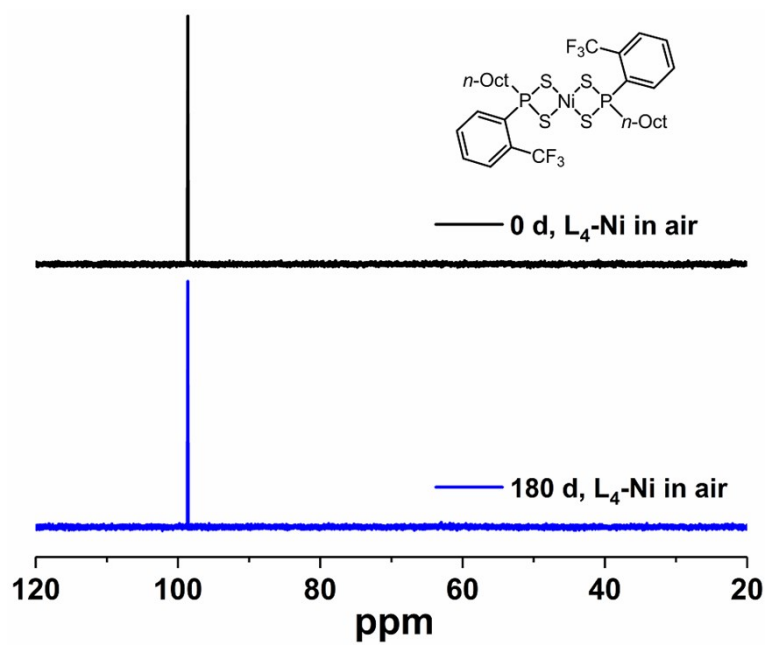

(d)

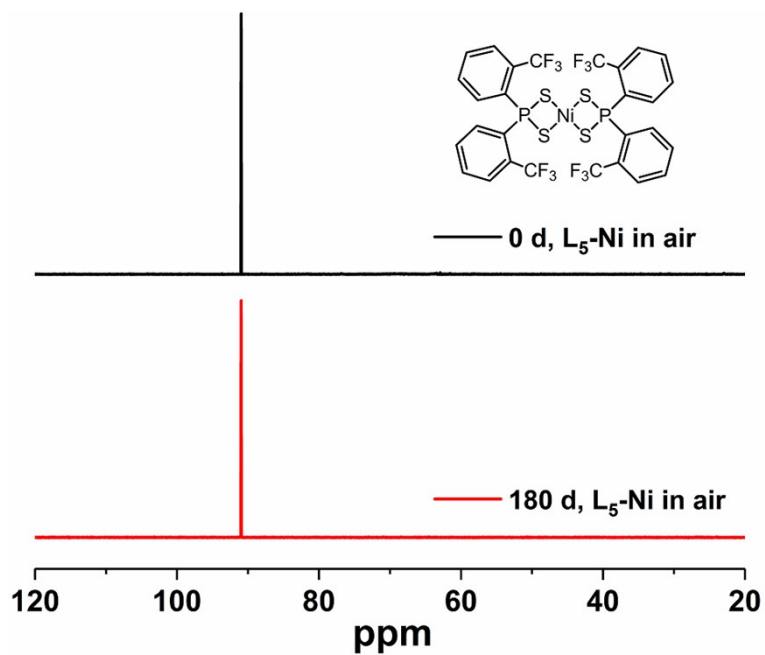

(e)

**Figure S15.**  $^{31}\text{P}$  NMR spectra of L<sub>1</sub>-Ni salt (a), L<sub>2</sub>-Ni salt (b), L<sub>3</sub>-Ni salt (c), L<sub>4</sub>-Ni salt (d), and L<sub>5</sub>-Ni salt (e) in air for 0 d and 180 d.

## 8. Theoretical Calculations

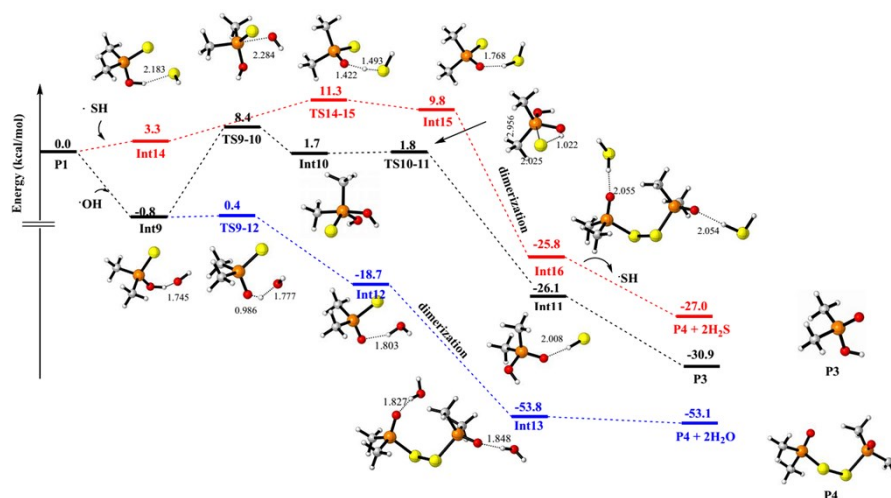

**Figure S16.** Gibbs free energy profile from P1 (R<sub>1</sub>R<sub>2</sub>PSOH) to generate P3 (R<sub>1</sub>R<sub>2</sub>POOH) and P4 (R<sub>1</sub>R<sub>2</sub>POS-SOPR<sub>1</sub>R<sub>2</sub>) at CCSD(T)/6-311++G(d,p)//B3LYP/6-311++G(d,p) level (in kcal/mol). The name of species is labeled below and the corresponding energy is labeled above. The unit of bond length is angstrom.

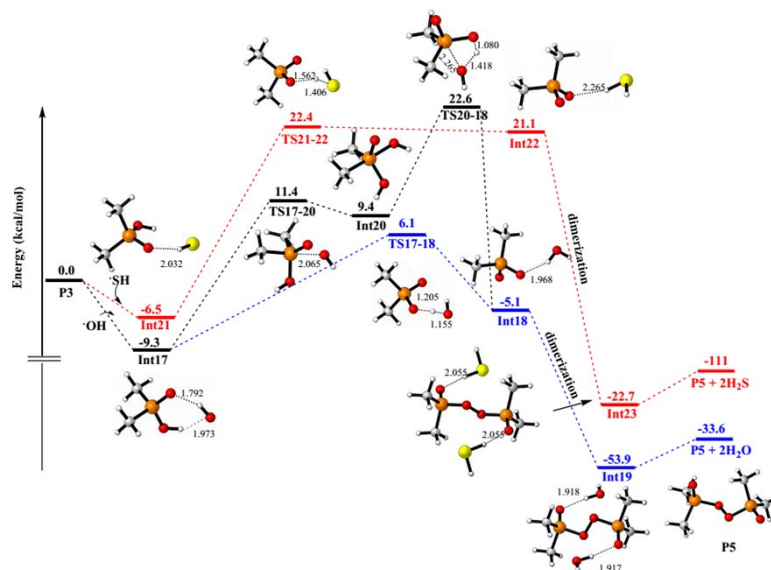

**Figure S17.** Potential energy profile from P4 (R<sub>1</sub>R<sub>2</sub>POS-SOPR<sub>1</sub>R<sub>2</sub>) to generate P5 (R<sub>1</sub>R<sub>2</sub>POO-OOPR<sub>1</sub>R<sub>2</sub>) at CCSD(T)/6-311++G(d,p)//B3LYP/6-311++G(d,p) level (in kcal/mol). The name of species is labeled below and the corresponding energy is labeled above. The unit of bond length is angstrom.



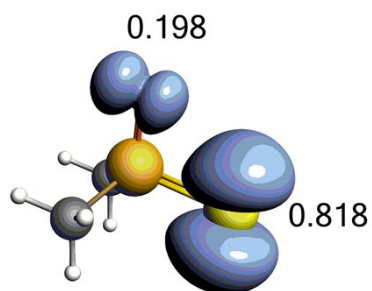

**Figure S18.** The net spin polarization (electrons spin-A minus spin-B) for  $(\text{CH}_3)_2\text{PS}_2$  radical.

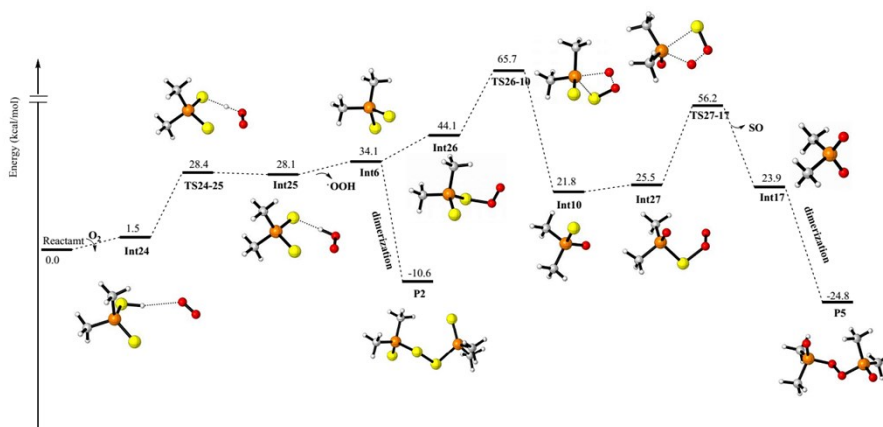

**Figure S19.** Potential energy profile from MeDAPH to generate P2 ( $\text{R}_1\text{R}_2\text{PSS-SSPR}_1\text{R}_2$ ) and P5 ( $\text{R}_1\text{R}_2\text{POO-OOPR}_1\text{R}_2$ ) at CCSD(T)/6-311++G(d,p)//B3LYP/6-311++G(d,p) level (in kcal/mol). The name of species is labeled below and the corresponding energy is labeled above. The unit of bond length is angstrom.

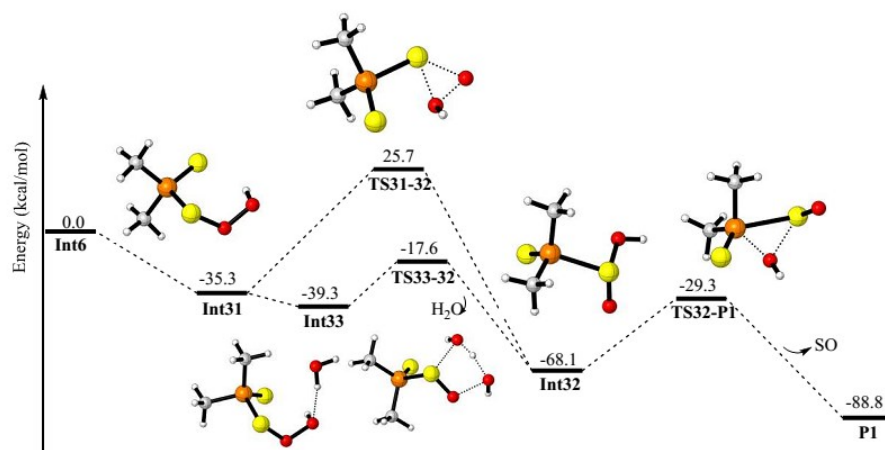

**Figure S20.** Potential energy profile from Int6 to generate P1 ( $R_1R_2PSOH$ ) at CCSD(T)/6-311++G(d,p)//B3LYP/6-311++G(d,p) level (in kcal/mol). The name of species is labeled below and the corresponding energy is labeled above. The unit of bond length is angstrom.

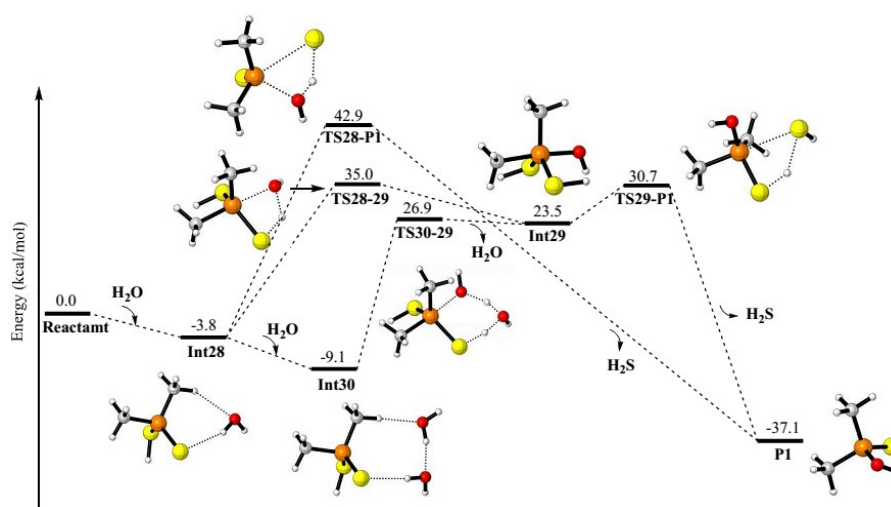

**Figure S21.** Potential energy profile from MeDAPH to generate P1 ( $R_1R_2PSOH$ ) at CCSD(T)/6-311++G(d,p)//B3LYP/6-311++G(d,p) level (in kcal/mol). The name of species is labeled below and the corresponding energy is labeled above. The unit of bond length is angstrom.

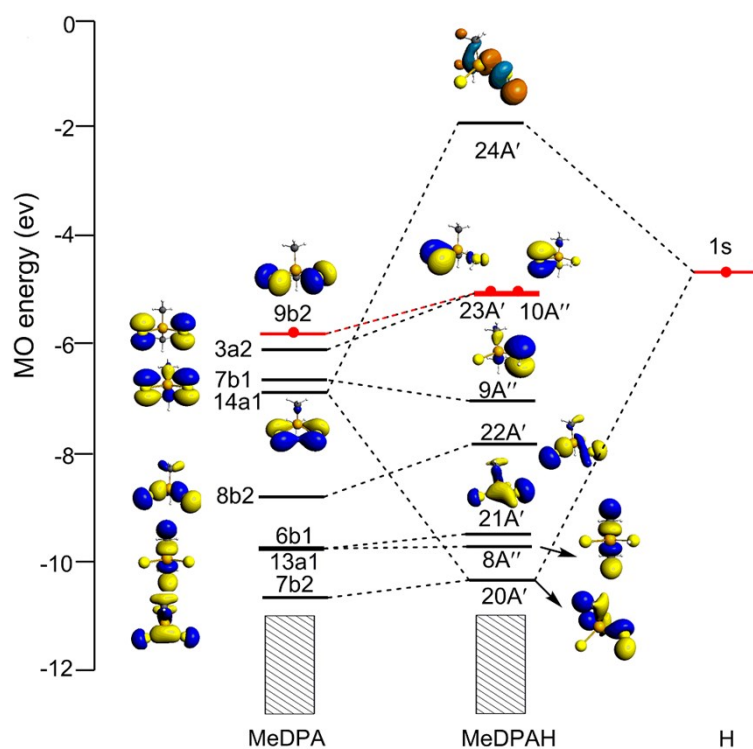

**Figure S22.** The MO bonding scheme of MeDPAH at the level of PBE/TZ2P (isovalue = 0.03), illustrating the bonding interactions between MeDPA and H atom.

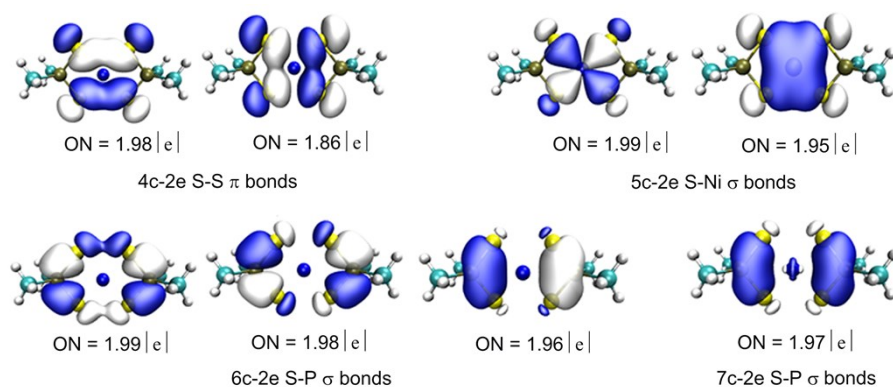

**Figure S23.** AdNDP bonding analysis for Ni(MeDPA)<sub>2</sub> at the B3LYP/6-311++g(d,p) level. Occupation numbers (ON) are shown.

**Cartesian coordinates for all optimized structures of the stationary points.**

Reactant

|   |             |             |             |
|---|-------------|-------------|-------------|
| P | 0.14119600  | -0.24104100 | 0.00252800  |
| C | -0.09591700 | -1.35609000 | -1.42910200 |
| H | -0.09610600 | -0.76112600 | -2.34211300 |
| H | 0.73842500  | -2.05920800 | -1.46006600 |
| H | -1.03761600 | -1.90393000 | -1.34650000 |
| C | 0.04623300  | -1.33608500 | 1.46780100  |
| H | 0.07634500  | -0.72117800 | 2.36732100  |
| H | -0.87662200 | -1.91927200 | 1.45557300  |
| H | 0.91305700  | -2.00024000 | 1.46264500  |
| S | 1.73786100  | 0.89346000  | -0.05416200 |
| S | -1.75664200 | 0.80792300  | -0.00663900 |
| H | -1.23682600 | 1.91149100  | 0.56584100  |

• OH

|   |            |            |             |
|---|------------|------------|-------------|
| O | 0.00000000 | 0.00000000 | 0.10843500  |
| H | 0.00000000 | 0.00000000 | -0.86748300 |

• SH

|   |            |            |             |
|---|------------|------------|-------------|
| S | 0.00000000 | 0.00000000 | 0.07959400  |
| H | 0.00000000 | 0.00000000 | -1.27350500 |

Int1

|   |             |             |             |
|---|-------------|-------------|-------------|
| P | -0.42906200 | -0.28458300 | 0.10029100  |
| S | -0.65421300 | 1.72993300  | -0.50495800 |
| S | 1.16973700  | -1.21301100 | -0.69038600 |
| C | -0.40703300 | -0.31875100 | 1.92289100  |
| H | -1.27514000 | 0.21029600  | 2.31999700  |
| H | -0.40897000 | -1.35905500 | 2.25454500  |
| H | 0.51453400  | 0.16462500  | 2.24596000  |

|       |             |             |             |
|-------|-------------|-------------|-------------|
| C     | -1.98844200 | -1.07493000 | -0.41909100 |
| H     | -2.83989900 | -0.54495400 | 0.01353200  |
| H     | -2.05919300 | -1.05459100 | -1.50655100 |
| H     | -1.99070900 | -2.11179900 | -0.07887600 |
| O     | 2.12013000  | 0.81168700  | 0.45036600  |
| H     | 0.68918100  | 1.88346200  | -0.26054600 |
| H     | 2.96955200  | 0.67858800  | 0.00733600  |
| TS1-2 |             |             |             |
| P     | -0.00561100 | 0.25950100  | 0.14482200  |
| S     | 1.83741400  | -0.55741100 | -0.59023200 |
| S     | -1.81900600 | -0.04000300 | -0.74942400 |
| C     | 0.00466600  | 0.47625700  | 1.96306700  |
| H     | 0.97825200  | 0.86995400  | 2.26002900  |
| H     | -0.77114400 | 1.20388900  | 2.21027400  |
| H     | -0.19961700 | -0.46763900 | 2.45837500  |
| C     | 0.40526900  | 1.98937700  | -0.39699300 |
| H     | 1.34490100  | 2.32622300  | 0.04667000  |
| H     | 0.48779700  | 2.03341400  | -1.48431000 |
| H     | -0.39984900 | 2.65857000  | -0.08656300 |
| O     | -0.63910200 | -1.70851900 | 0.58360500  |
| H     | 1.67970800  | -1.77370600 | -0.03499900 |
| H     | -0.67721300 | -2.31024500 | -0.17259600 |
| Int2  |             |             |             |
| P     | -0.04607200 | 0.11882100  | 0.18659800  |
| S     | 1.93971700  | -0.27192500 | -0.62472600 |
| S     | -1.91062200 | -0.21589800 | -0.73099700 |
| C     | -0.06168900 | 0.49904400  | 1.98218000  |
| H     | 0.86013900  | 1.02617800  | 2.23331400  |
| H     | -0.91019600 | 1.15588600  | 2.18209300  |
| H     | -0.14899000 | -0.41195900 | 2.56729500  |

|        |             |             |             |
|--------|-------------|-------------|-------------|
| C      | 0.08793100  | 1.89968100  | -0.43594400 |
| H      | 0.97759100  | 2.37976500  | -0.02057800 |
| H      | 0.15197900  | 1.92155800  | -1.52543000 |
| H      | -0.79787700 | 2.46024300  | -0.12855200 |
| O      | -0.24898400 | -1.65023600 | 0.57449600  |
| H      | 2.12178600  | -1.48945000 | -0.07774500 |
| H      | -0.19445300 | -2.20982700 | -0.21117600 |
| TS2-P1 |             |             |             |
| P      | -0.22193600 | -0.00202500 | 0.06483700  |
| S      | 2.42987500  | 0.07611700  | -0.14726900 |
| S      | -2.37185000 | -0.00131300 | -0.24340500 |
| C      | -0.04543800 | -1.61727200 | 0.90231100  |
| H      | 0.85657200  | -1.63157800 | 1.50994700  |
| H      | -0.93863000 | -1.80733500 | 1.50142300  |
| H      | 0.01853400  | -2.38171300 | 0.12571300  |
| C      | -0.05270500 | 1.43350700  | 1.18144100  |
| H      | 0.91387500  | 1.43053200  | 1.67978500  |
| H      | -0.15914600 | 2.33258800  | 0.57150700  |
| H      | -0.87221800 | 1.41153500  | 1.90203400  |
| O      | -0.04751600 | 0.18580800  | -1.53679200 |
| H      | 2.62803800  | -1.20675300 | -0.51800900 |
| H      | 0.92261700  | 0.30236200  | -1.70234900 |
| Int3   |             |             |             |
| P      | 0.91147600  | -0.08902500 | -0.01292400 |
| C      | 2.18441000  | 0.13869400  | -1.28689400 |
| H      | 1.69149800  | 0.30510600  | -2.24496200 |
| H      | 2.79823800  | 1.00724200  | -1.04303000 |
| H      | 2.81042900  | -0.75442000 | -1.34803300 |
| C      | 1.78771600  | -0.45422600 | 1.53742700  |
| H      | 1.04899000  | -0.66635900 | 2.31124800  |

|       |             |             |             |
|-------|-------------|-------------|-------------|
| H     | 2.43600500  | -1.32324400 | 1.40404700  |
| H     | 2.38003200  | 0.41095800  | 1.84008100  |
| S     | -0.35899300 | 1.45077600  | 0.14200300  |
| O     | 0.19426500  | -1.47123100 | -0.43216600 |
| H     | -0.79581400 | -1.40136900 | -0.34992300 |
| S     | -2.67858900 | -0.36549700 | 0.03413300  |
| H     | -2.82708900 | 0.05604000  | -1.23960000 |
| P1    |             |             |             |
| P     | -0.18521200 | 0.00000700  | 0.02561000  |
| C     | -1.04287300 | 1.45182800  | -0.66284600 |
| H     | -0.61935300 | 2.35111800  | -0.21468200 |
| H     | -0.88809200 | 1.48615200  | -1.74239900 |
| H     | -2.11107000 | 1.40124400  | -0.44047300 |
| C     | -1.04328900 | -1.45086000 | -0.66424700 |
| H     | -0.61999900 | -2.35072000 | -0.21702000 |
| H     | -2.11146900 | -1.40017700 | -0.44180500 |
| H     | -0.88857700 | -1.48413300 | -1.74384600 |
| S     | 1.76330400  | -0.00005600 | -0.15811300 |
| O     | -0.71369100 | -0.00097200 | 1.58817800  |
| H     | 0.03037700  | -0.00071800 | 2.20302800  |
| TS1-4 |             |             |             |
| P     | 0.64684700  | 0.03495400  | 0.04136100  |
| C     | 1.98184500  | -0.45389800 | -1.10678300 |
| H     | 1.61252800  | -0.38081000 | -2.12956300 |
| H     | 2.81504300  | 0.23950700  | -0.97908900 |
| H     | 2.31490800  | -1.47437700 | -0.90508000 |
| C     | 1.33325700  | -0.21562800 | 1.71982200  |
| H     | 0.54356900  | -0.04363400 | 2.45149000  |
| H     | 1.71853600  | -1.23097300 | 1.83001100  |
| H     | 2.13085200  | 0.51237600  | 1.88179500  |

|      |             |             |             |
|------|-------------|-------------|-------------|
| H    | -1.79345900 | -0.94479600 | 0.38790400  |
| O    | -2.94391000 | 0.20711300  | 0.16111700  |
| H    | -2.36278900 | 0.98471800  | -0.00765200 |
| S    | -0.07248600 | 1.84902900  | -0.25658500 |
| S    | -0.74134100 | -1.58815900 | -0.25075200 |
| Int4 |             |             |             |
| P    | 0.60797000  | -0.14662000 | 0.20871000  |
| C    | 2.29683400  | -0.81695400 | 0.35182700  |
| H    | 2.80677500  | -0.69902500 | -0.60376800 |
| H    | 2.84180700  | -0.27164200 | 1.12597400  |
| H    | 2.24952500  | -1.87686300 | 0.61239200  |
| C    | -0.15748700 | -0.37916200 | 1.84263500  |
| H    | -1.19325000 | -0.03862700 | 1.80054100  |
| H    | -0.13184100 | -1.43992600 | 2.10479700  |
| H    | 0.40010400  | 0.19678900  | 2.58534700  |
| H    | -2.62208300 | -0.24934600 | -0.25984100 |
| O    | -3.16970200 | 0.09484700  | 0.46178800  |
| H    | -3.50751800 | 0.93522300  | 0.13682200  |
| S    | 0.59050600  | 1.78137200  | -0.41819900 |
| S    | -0.43060100 | -1.02758200 | -1.30017500 |
| Int5 |             |             |             |
| P    | -2.35822700 | -0.53191400 | -0.05896700 |
| C    | -3.86166200 | -0.76534800 | -1.07950800 |
| H    | -4.22311900 | 0.20707700  | -1.41580500 |
| H    | -3.64744700 | -1.39791000 | -1.94239700 |
| H    | -4.62889900 | -1.22415100 | -0.45266200 |
| C    | -1.70233100 | -2.20725000 | 0.24670500  |
| H    | -0.72201400 | -2.17036100 | 0.72304900  |
| H    | -2.40815500 | -2.70438500 | 0.91606900  |
| H    | -1.62359900 | -2.75963600 | -0.69139300 |



|    |             |             |             |
|----|-------------|-------------|-------------|
| S  | -1.03649300 | 0.38968000  | -1.55074800 |
| H  | -1.49387500 | 2.62209900  | 0.89835900  |
| O  | -0.80935400 | 3.28789100  | 0.71876100  |
| H  | -1.10797200 | 4.08452300  | 1.16762500  |
| P  | 2.11258000  | 0.50323500  | -0.01583700 |
| C  | 2.18555400  | 2.22041000  | -0.61671400 |
| H  | 2.55857600  | 2.23034700  | -1.64051900 |
| H  | 1.19364600  | 2.67488500  | -0.55251200 |
| H  | 2.87713900  | 2.77013900  | 0.02608100  |
| C  | 1.28899200  | 0.57400900  | 1.60440000  |
| H  | 1.12380400  | -0.43912900 | 1.96998800  |
| H  | 1.96813600  | 1.09643200  | 2.28331900  |
| H  | 0.35170900  | 1.12606000  | 1.54004000  |
| S  | 0.82797000  | -0.58203700 | -1.39678700 |
| S  | -2.68017100 | 0.55311400  | 1.56197300  |
| S  | 3.80201900  | -0.52361600 | -0.05687300 |
| O  | 1.67333000  | -2.80283400 | 1.45778200  |
| H  | 2.04294700  | -3.48389400 | 2.02765500  |
| H  | 2.43551300  | -2.40756600 | 1.00247200  |
| P2 |             |             |             |
| P  | 2.27333500  | 0.21193500  | -0.01259000 |
| C  | 1.90213900  | 1.98218900  | 0.24214100  |
| H  | 0.99211600  | 2.06967500  | 0.83476600  |
| H  | 2.73964000  | 2.43117500  | 0.78072100  |
| H  | 1.75424400  | 2.48376500  | -0.71618600 |
| C  | 3.63164700  | 0.17482400  | -1.24209900 |
| H  | 3.88388600  | -0.86232300 | -1.46123300 |
| H  | 3.34411800  | 0.68952100  | -2.16226800 |
| H  | 4.50026700  | 0.67009600  | -0.80368500 |
| S  | 2.56525400  | -0.82331500 | 1.61724900  |

|       |             |             |             |
|-------|-------------|-------------|-------------|
| S     | 0.67935900  | -0.52895200 | -1.37252900 |
| P     | -2.33190600 | 0.03016900  | 0.07664800  |
| C     | -3.31736500 | -0.21780300 | -1.44672100 |
| H     | -2.73878700 | 0.14251000  | -2.29776700 |
| H     | -3.55491900 | -1.27405300 | -1.58472800 |
| H     | -4.23337600 | 0.37102200  | -1.36789000 |
| C     | -3.25937400 | -0.82146500 | 1.40677000  |
| H     | -2.69599500 | -0.74187300 | 2.33643400  |
| H     | -4.22017200 | -0.31757800 | 1.52807800  |
| H     | -3.42428800 | -1.87315500 | 1.16128500  |
| S     | -0.70078000 | -1.43261000 | -0.10425600 |
| S     | -1.86948800 | 1.90195200  | 0.42397700  |
| Int6  |             |             |             |
| P     | -0.91409900 | -0.17971500 | 0.06905900  |
| C     | -2.50720300 | -0.39355100 | -0.79594100 |
| H     | -2.34048300 | -0.31404600 | -1.86986900 |
| H     | -2.90126300 | -1.38464100 | -0.56486900 |
| H     | -3.21837200 | 0.37132300  | -0.47591600 |
| C     | -1.30242000 | -0.26601000 | 1.85330300  |
| H     | -0.39123500 | -0.06888400 | 2.41858900  |
| H     | -2.05892000 | 0.47713900  | 2.11257800  |
| H     | -1.65840300 | -1.27075000 | 2.08992000  |
| H     | 0.92759500  | 1.57074600  | -0.10792800 |
| S     | 0.45516500  | -1.53013300 | -0.48434700 |
| S     | -0.40446700 | 1.84047500  | -0.34469600 |
| S     | 2.77429300  | 0.13752000  | 0.21238100  |
| H     | 3.01044000  | 0.10640200  | -1.11599100 |
| TS6-7 |             |             |             |
| P     | -0.32576400 | 0.10817200  | -0.16609300 |
| C     | -0.87483200 | -1.44304000 | 0.62865300  |

|      |             |             |             |
|------|-------------|-------------|-------------|
| H    | -0.37307500 | -2.28102900 | 0.14558000  |
| H    | -0.61100800 | -1.42393700 | 1.68804300  |
| H    | -1.95546100 | -1.55203200 | 0.51409200  |
| C    | -1.22976100 | 1.43666600  | 0.70392900  |
| H    | -0.94672300 | 2.39378400  | 0.26630000  |
| H    | -2.30538600 | 1.28876800  | 0.58638800  |
| H    | -0.96314600 | 1.42964300  | 1.76279300  |
| H    | 0.63397800  | 0.41397300  | -2.56109300 |
| S    | 1.69715200  | 0.34526000  | 0.10610500  |
| S    | -0.89092100 | 0.08857300  | -2.14667000 |
| S    | 2.30261800  | 0.73638400  | -2.59523000 |
| H    | 2.62403400  | -0.57232000 | -2.61391600 |
| Int7 |             |             |             |
| P    | -1.00433700 | -0.01059000 | 0.00349700  |
| C    | -2.11466600 | -0.34262800 | -1.41324600 |
| H    | -1.55095800 | -0.21957500 | -2.33761300 |
| H    | -2.50928100 | -1.35959500 | -1.35909100 |
| H    | -2.93421800 | 0.37909600  | -1.39235100 |
| C    | -2.03948100 | -0.31607500 | 1.48139600  |
| H    | -1.42630100 | -0.17888600 | 2.37177300  |
| H    | -2.85853800 | 0.40630200  | 1.49372100  |
| H    | -2.43594700 | -1.33358800 | 1.46566900  |
| H    | 1.88205100  | 1.00686200  | 0.09070600  |
| S    | 0.42660900  | -1.56229300 | -0.02653500 |
| S    | -0.25359100 | 1.83828300  | -0.03075300 |
| S    | 2.88014900  | 0.05786000  | 0.08635500  |
| H    | 2.97245100  | 0.06883600  | -1.25924700 |
| Int8 |             |             |             |
| P    | 1.76438100  | -1.44224900 | 0.24189200  |
| C    | 3.33160800  | -1.74861400 | 1.13734800  |

|      |             |             |             |
|------|-------------|-------------|-------------|
| H    | 3.96882100  | -0.86624100 | 1.06049700  |
| H    | 3.14024000  | -1.98010800 | 2.18635900  |
| H    | 3.83476400  | -2.58719500 | 0.65185700  |
| C    | 0.65852800  | -2.84101800 | 0.63412100  |
| H    | -0.33463400 | -2.64742600 | 0.22758100  |
| H    | 1.07099600  | -3.72993900 | 0.15261000  |
| H    | 0.59429700  | -2.99031400 | 1.71336900  |
| S    | 1.03351200  | 0.22469800  | 1.48241300  |
| P    | -1.80357900 | 1.54194800  | -0.07425400 |
| C    | -1.02291100 | 3.13829000  | 0.34204600  |
| H    | -1.37729200 | 3.46172500  | 1.32039000  |
| H    | 0.06482800  | 3.04364600  | 0.35090700  |
| H    | -1.32173600 | 3.87116700  | -0.41055000 |
| C    | -1.10713700 | 1.05549500  | -1.68452800 |
| H    | -1.48824400 | 0.07167500  | -1.95709300 |
| H    | -1.43736300 | 1.78957100  | -2.42362900 |
| H    | -0.01728100 | 1.01930300  | -1.65196600 |
| S    | -1.07462000 | 0.13071600  | 1.41563600  |
| S    | 1.98735800  | -1.10052200 | -1.68500200 |
| S    | -3.76559700 | 1.48783100  | 0.06323700  |
| S    | 4.32965000  | 1.98771500  | -0.64700700 |
| H    | 3.57906000  | 1.01873300  | -1.22613900 |
| H    | 5.41757600  | 1.67741800  | -1.37992700 |
| S    | -3.65060900 | -2.52010000 | -0.71012300 |
| H    | -4.11979200 | -2.42076000 | -1.96974800 |
| H    | -3.90188400 | -1.21707800 | -0.43946600 |
| Int9 |             |             |             |
| P    | -0.49551400 | -0.05935100 | -0.02462100 |
| C    | -0.67759700 | -1.11570800 | 1.44086100  |
| H    | 0.29902700  | -1.54960700 | 1.65737900  |

|         |             |             |             |
|---------|-------------|-------------|-------------|
| H       | -1.00163100 | -0.52050500 | 2.29617900  |
| H       | -1.40017400 | -1.91102900 | 1.24488100  |
| C       | -2.12470800 | 0.61847200  | -0.43259300 |
| H       | -2.04267100 | 1.21585800  | -1.34077900 |
| H       | -2.83069200 | -0.19730300 | -0.60188600 |
| H       | -2.48439000 | 1.25029000  | 0.38070800  |
| S       | 0.89929000  | 1.36656300  | 0.24096500  |
| O       | -0.17907200 | -1.02276200 | -1.26991600 |
| H       | 0.80345300  | -1.19044700 | -1.24764800 |
| O       | 2.12568500  | -0.81954600 | -0.17153200 |
| H       | 2.94207800  | -0.35011600 | -0.39298400 |
| Int10   |             |             |             |
| P       | 0.25850800  | -0.03368000 | -0.01755200 |
| S       | -1.78374300 | 0.41564100  | 0.08786300  |
| C       | 1.11714000  | -0.54402800 | 1.52044700  |
| H       | 2.04260400  | -1.04549400 | 1.22593700  |
| H       | 1.35299700  | 0.31885100  | 2.14199100  |
| H       | 0.49997100  | -1.25503900 | 2.06500600  |
| C       | 0.81474800  | 1.77729700  | -0.01052800 |
| H       | 1.90749100  | 1.84588100  | 0.03474600  |
| H       | 0.45999300  | 2.30800400  | -0.89815800 |
| H       | 0.40924300  | 2.28471200  | 0.86737200  |
| O       | -0.39505900 | -1.68827200 | -0.15480400 |
| H       | -0.51105000 | -1.94484200 | -1.07825300 |
| O       | 1.07258100  | -0.37013700 | -1.43802400 |
| H       | 1.48951600  | 0.41052400  | -1.81807300 |
| TS10-11 |             |             |             |
| P       | 0.55893600  | 0.03035000  | -0.05347100 |
| S       | -1.98701300 | 0.44596300  | 1.39027300  |
| C       | 1.15047500  | -0.65724100 | 1.51158400  |

|       |             |             |             |
|-------|-------------|-------------|-------------|
| H     | 2.23593500  | -0.53175500 | 1.54190300  |
| H     | 0.66587100  | -0.16859900 | 2.35228900  |
| H     | 0.91503500  | -1.72316000 | 1.52377300  |
| C     | 0.62656500  | 1.83558800  | -0.12390500 |
| H     | 1.67256700  | 2.12529000  | -0.25388200 |
| H     | 0.05546000  | 2.16154300  | -0.99517000 |
| H     | 0.19557000  | 2.26895200  | 0.77429900  |
| O     | -0.59977500 | -0.73993900 | -0.83411600 |
| H     | -1.44016900 | -0.55684800 | -0.28137200 |
| O     | 1.79836000  | -0.35202800 | -1.06044300 |
| H     | 1.53994200  | -0.96394600 | -1.75948400 |
| Int11 |             |             |             |
| P     | -1.04580300 | -0.00124000 | -0.07859300 |
| S     | 3.53087900  | -0.00251200 | 0.02665800  |
| C     | -1.32227700 | 1.46742200  | 0.94790800  |
| H     | -2.33084100 | 1.46789400  | 1.36529800  |
| H     | -0.58887400 | 1.48767800  | 1.75643100  |
| H     | -1.18822400 | 2.35464200  | 0.32692600  |
| C     | -1.36856600 | -1.45432600 | 0.95636700  |
| H     | -2.37722500 | -1.42106300 | 1.37222200  |
| H     | -1.26118000 | -2.34896100 | 0.34088300  |
| H     | -0.63732500 | -1.49225700 | 1.76620500  |
| O     | 0.26685900  | -0.02364700 | -0.79646400 |
| H     | 2.23302600  | -0.00977100 | -0.39025500 |
| O     | -2.32611700 | 0.01484400  | -1.10205300 |
| H     | -2.03723000 | 0.01246700  | -2.02285900 |
| P3    |             |             |             |
| P     | -0.18521100 | -0.00000300 | 0.02552600  |
| C     | -1.04296700 | -1.45136400 | -0.66367700 |
| H     | -2.11112900 | -1.40094900 | -0.44109100 |

|   |             |             |             |
|---|-------------|-------------|-------------|
| H | -0.88839300 | -1.48510400 | -1.74327900 |
| H | -0.61930800 | -2.35086500 | -0.21607200 |
| C | -1.04285300 | 1.45149600  | -0.66353900 |
| H | -2.11114100 | 1.40079800  | -0.44162000 |
| H | -0.61963400 | 2.35087600  | -0.21527000 |
| H | -0.88763100 | 1.48575500  | -1.74303000 |
| O | -0.71406600 | -0.00010500 | 1.58802700  |
| H | 0.02989900  | 0.00006800  | 2.20300300  |
| S | 1.76330900  | -0.00003000 | -0.15790400 |

TS9-12

|   |             |             |             |
|---|-------------|-------------|-------------|
| P | -0.49522500 | -0.05264400 | -0.01866200 |
| C | -0.78372300 | -1.06521000 | 1.46449000  |
| H | 0.14878400  | -1.56992000 | 1.71700000  |
| H | -1.08521400 | -0.42629800 | 2.29595200  |
| H | -1.55880100 | -1.80711400 | 1.25994200  |
| C | -2.08190000 | 0.69006600  | -0.48207500 |
| H | -1.94510600 | 1.25839100  | -1.40228300 |
| H | -2.82137000 | -0.09654600 | -0.64624900 |
| H | -2.42212100 | 1.35979500  | 0.30884600  |
| S | 0.94930600  | 1.31854200  | 0.23509700  |
| O | -0.22224400 | -1.07634000 | -1.23192400 |
| H | 0.73680700  | -1.30167700 | -1.19332200 |
| O | 2.16948800  | -0.76849300 | -0.28750900 |
| H | 2.80227300  | -0.71410500 | 0.43945600  |

Int12

|   |            |             |             |
|---|------------|-------------|-------------|
| P | 0.58762200 | -0.21562200 | -0.06065500 |
| C | 1.83188400 | 0.43156100  | -1.22251600 |
| H | 1.35188900 | 0.61151300  | -2.18476100 |
| H | 2.26991400 | 1.36258200  | -0.85638900 |
| H | 2.61812800 | -0.31755100 | -1.34691800 |

|       |             |             |             |
|-------|-------------|-------------|-------------|
| C     | 1.45418400  | -0.46089600 | 1.52192900  |
| H     | 0.72972100  | -0.79964300 | 2.26349900  |
| H     | 2.22135400  | -1.22851500 | 1.39306200  |
| H     | 1.91361500  | 0.46754000  | 1.86681300  |
| S     | -0.80449300 | 1.35758200  | 0.21980200  |
| O     | -0.10333100 | -1.46730000 | -0.54867100 |
| H     | -1.86584400 | -1.19735500 | -0.28008700 |
| O     | -2.62467400 | -0.63497000 | -0.00581400 |
| H     | -3.07358500 | -0.39138000 | -0.82282600 |
| Int13 |             |             |             |
| P     | -2.50112800 | -0.15649300 | 0.10538100  |
| C     | -3.85288600 | 0.18445800  | -1.06693500 |
| H     | -3.55047300 | 0.99517600  | -1.73174300 |
| H     | -4.10914800 | -0.69914400 | -1.65363700 |
| H     | -4.72443300 | 0.50876400  | -0.49343900 |
| C     | -2.98738000 | -1.58195400 | 1.12263000  |
| H     | -2.12679400 | -1.90874000 | 1.70769200  |
| H     | -3.77955700 | -1.26297400 | 1.80362500  |
| H     | -3.33624800 | -2.40556100 | 0.49819300  |
| S     | -0.98549000 | -0.85719400 | -1.25903000 |
| O     | -2.09242000 | 1.03368700  | 0.93364600  |
| H     | -1.40735300 | 2.53330900  | 0.14573900  |
| O     | -0.91377900 | 3.14559200  | -0.43259700 |
| H     | -1.10072500 | 4.03052700  | -0.10797000 |
| P     | 1.88138600  | 0.08371500  | 0.49690500  |
| C     | 1.87413200  | 1.22132000  | -0.91159400 |
| H     | 2.10405200  | 0.67611200  | -1.82726000 |
| H     | 0.92804900  | 1.75941700  | -0.99523100 |
| H     | 2.68016300  | 1.93744500  | -0.72668600 |
| C     | 1.14520800  | 0.93711400  | 1.91766700  |



|    |             |             |             |
|----|-------------|-------------|-------------|
| H  | 1.19590200  | 0.27093800  | 2.78019300  |
| H  | 1.74283300  | 1.82967500  | 2.12092900  |
| H  | 0.10924200  | 1.21590600  | 1.72134700  |
| S  | 0.53398700  | -1.58315300 | 0.01255700  |
| O  | 3.20209000  | -0.56174500 | 0.80915400  |
| O  | 5.32494700  | -0.19284500 | -0.99152400 |
| H  | 5.98650000  | -0.88804000 | -0.94431200 |
| H  | 4.66704100  | -0.41872300 | -0.30820600 |
| P4 |             |             |             |
| P  | -2.11338000 | 0.34652800  | -0.10002800 |
| C  | -2.81473900 | -0.44725100 | -1.58348500 |
| H  | -3.53845400 | 0.23699100  | -2.03242000 |
| H  | -2.00909500 | -0.62444400 | -2.29735500 |
| H  | -3.29601900 | -1.39432800 | -1.33537400 |
| C  | -3.42332800 | 0.37034300  | 1.16891900  |
| H  | -3.81253800 | -0.62985900 | 1.36852800  |
| H  | -3.01763900 | 0.79798400  | 2.08672400  |
| H  | -4.23223800 | 1.01121500  | 0.81050100  |
| S  | -0.79732500 | -1.12933600 | 0.78853100  |
| O  | -1.48216700 | 1.67374100  | -0.38284800 |
| P  | 2.20777600  | 0.24851400  | 0.21806500  |
| C  | 3.69368200  | -0.32247700 | -0.67768500 |
| H  | 4.49497000  | 0.39868500  | -0.49880800 |
| H  | 3.99560700  | -1.29258600 | -0.28191500 |
| H  | 3.51473800  | -0.40073500 | -1.75231300 |
| C  | 1.73713200  | 1.85031000  | -0.49648800 |
| H  | 1.80060000  | 1.81694000  | -1.58607200 |
| H  | 0.70984500  | 2.08824800  | -0.21373200 |
| H  | 2.42222300  | 2.60681900  | -0.10524200 |
| S  | 0.77995600  | -1.21172900 | -0.59974100 |

|         |             |             |             |
|---------|-------------|-------------|-------------|
| O       | 2.31635200  | 0.22762500  | 1.70518600  |
| In14    |             |             |             |
| P       | 0.91162900  | -0.08897400 | -0.01277600 |
| C       | 2.18229500  | 0.13615100  | -1.28952100 |
| H       | 1.68771200  | 0.30089600  | -2.24701700 |
| H       | 2.79682900  | 1.00497500  | -1.04841600 |
| H       | 2.80797100  | -0.75724600 | -1.35012500 |
| C       | 1.79088000  | -0.45025200 | 1.53675900  |
| H       | 1.05372000  | -0.66078100 | 2.31250900  |
| H       | 2.43919100  | -1.31937400 | 1.40418500  |
| H       | 2.38352300  | 0.41582000  | 1.83622000  |
| S       | -0.35919300 | 1.45065100  | 0.14063500  |
| O       | 0.19423200  | -1.47253400 | -0.42718200 |
| H       | -0.79587600 | -1.40225700 | -0.34618100 |
| S       | -2.67915400 | -0.36543400 | 0.03463800  |
| H       | -2.82686000 | 0.05397900  | -1.23988100 |
| TS14-15 |             |             |             |
| P       | -0.88783500 | -0.19457200 | 0.00479100  |
| C       | -1.98902500 | -0.09488800 | 1.45064700  |
| H       | -1.37963300 | -0.11555100 | 2.35461400  |
| H       | -2.56923900 | 0.82958800  | 1.43063900  |
| H       | -2.66295700 | -0.95509200 | 1.44945400  |
| C       | -1.97085200 | -0.16070000 | -1.45724300 |
| H       | -1.34843500 | -0.21886400 | -2.35073000 |
| H       | -2.64246000 | -1.02225400 | -1.42835400 |
| H       | -2.55324200 | 0.76218000  | -1.48557500 |
| S       | 0.33824900  | 1.48828900  | -0.02372900 |
| O       | -0.05613100 | -1.48799000 | 0.03886500  |
| H       | 1.32162000  | -1.13736100 | -0.00691300 |
| S       | 2.57790500  | -0.33431000 | -0.07454700 |

|       |             |             |             |
|-------|-------------|-------------|-------------|
| H     | 2.70172200  | -0.25026700 | 1.26607100  |
| Int15 |             |             |             |
| P     | -0.92516000 | -0.23345000 | 0.01009500  |
| C     | -2.03908300 | -0.01704300 | 1.43688400  |
| H     | -1.44500800 | -0.04442400 | 2.35084800  |
| H     | -2.56781500 | 0.93652000  | 1.38074400  |
| H     | -2.75979000 | -0.83859500 | 1.45168700  |
| C     | -1.99097100 | -0.14658100 | -1.46584000 |
| H     | -1.36393100 | -0.24368200 | -2.35275700 |
| H     | -2.70546600 | -0.97320400 | -1.43857400 |
| H     | -2.52674900 | 0.80371700  | -1.50808700 |
| S     | 0.33198900  | 1.46001600  | -0.03995200 |
| O     | -0.14061200 | -1.52961500 | 0.07869700  |
| H     | 1.58615400  | -1.15796500 | -0.00050000 |
| S     | 2.67856400  | -0.30601500 | -0.07014900 |
| H     | 2.79637600  | -0.22597000 | 1.27099300  |
| Int16 |             |             |             |
| P     | -2.42693200 | -1.15437600 | 0.13125800  |
| C     | -3.75871100 | -1.51056500 | -1.06047100 |
| H     | -3.73317400 | -0.77260000 | -1.86356900 |
| H     | -3.66611400 | -2.51465000 | -1.47747300 |
| H     | -4.71263000 | -1.41799400 | -0.53597200 |
| C     | -2.42419600 | -2.48423200 | 1.37168300  |
| H     | -1.53404800 | -2.38428600 | 1.99386900  |
| H     | -3.31044200 | -2.36606200 | 1.99925600  |
| H     | -2.42801500 | -3.46596700 | 0.89620700  |
| S     | -0.69951800 | -1.50131400 | -1.12685500 |
| O     | -2.48338600 | 0.21941200  | 0.73637200  |
| P     | 1.62397000  | 0.61022400  | 0.38762000  |
| C     | 1.48621600  | 1.32542500  | -1.27660800 |

|       |             |             |             |
|-------|-------------|-------------|-------------|
| H     | 2.13601300  | 0.77694900  | -1.95914500 |
| H     | 0.45766700  | 1.30013800  | -1.63743700 |
| H     | 1.82512900  | 2.36285500  | -1.21820900 |
| C     | 0.45839900  | 1.49363100  | 1.45664100  |
| H     | 0.55699800  | 1.09734900  | 2.46829700  |
| H     | 0.73603700  | 2.55114200  | 1.45973000  |
| H     | -0.57223700 | 1.37138800  | 1.11901700  |
| S     | 0.92202800  | -1.45958500 | 0.22767500  |
| O     | 3.01641400  | 0.51664600  | 0.93545400  |
| S     | 6.11003900  | 0.07770300  | -0.42181200 |
| H     | 6.60770100  | 1.17386700  | 0.18405200  |
| H     | 4.90491000  | 0.20367700  | 0.18948500  |
| S     | -3.62309500 | 3.24153200  | -0.34759300 |
| H     | -3.22325100 | 2.04864500  | 0.16057800  |
| H     | -4.18585800 | 3.63043300  | 0.81342600  |
| Int17 |             |             |             |
| P     | 0.41052500  | 0.00001000  | -0.08668000 |
| C     | 1.47953800  | -1.46072900 | -0.00985600 |
| H     | 0.84857300  | -2.35099000 | -0.01160100 |
| H     | 2.13018700  | -1.48536900 | -0.88610300 |
| H     | 2.08448600  | -1.45049500 | 0.89873500  |
| C     | 1.47903700  | 1.46108600  | -0.00901000 |
| H     | 0.84771800  | 2.35109900  | -0.01023900 |
| H     | 2.08416700  | 1.45063500  | 0.89945000  |
| H     | 2.12949800  | 1.48644700  | -0.88538400 |
| O     | -0.36286600 | -0.00072000 | 1.34162200  |
| H     | -1.33475800 | -0.00039300 | 1.21705900  |
| O     | -0.53412700 | 0.00035000  | -1.25939900 |
| O     | -2.91059800 | -0.00005200 | 0.03002000  |
| H     | -2.23845800 | 0.00015900  | -0.70646900 |

TS17-18

|   |             |             |             |
|---|-------------|-------------|-------------|
| P | -0.38502300 | -0.00340100 | 0.11460200  |
| C | -1.76428200 | -1.16685200 | -0.12648000 |
| H | -1.39219100 | -2.17910100 | 0.03469200  |
| H | -2.53822500 | -0.94662000 | 0.61183700  |
| H | -2.17685100 | -1.08405100 | -1.13279500 |
| C | -1.01059700 | 1.66666900  | -0.22315500 |
| H | -0.17292100 | 2.36412600  | -0.16946600 |
| H | -1.45865300 | 1.71826600  | -1.21719600 |
| H | -1.74844400 | 1.94285300  | 0.53253900  |
| O | 0.59352200  | -0.37215900 | -1.12144800 |
| H | 1.74083200  | -0.45440100 | -0.76234700 |
| O | 0.30330100  | -0.12160400 | 1.44681400  |
| O | 2.59907300  | -0.03343100 | -0.11370700 |
| H | 2.20390500  | -0.09140800 | 0.78824500  |

Int18

|   |             |             |             |
|---|-------------|-------------|-------------|
| P | 0.57145800  | -0.05658700 | 0.06476300  |
| C | 2.18743600  | 0.05114200  | -0.73490200 |
| H | 2.59130800  | -0.95700700 | -0.83586600 |
| H | 2.08749500  | 0.50270000  | -1.72477700 |
| H | 2.86963100  | 0.65600300  | -0.13253400 |
| C | -0.09685400 | 1.60829500  | 0.24568300  |
| H | -1.11847800 | 1.52517400  | 0.62141300  |
| H | 0.51563300  | 2.18677400  | 0.94185000  |
| H | -0.11575400 | 2.11371600  | -0.72300500 |
| O | 0.66091000  | -0.79748700 | 1.43310100  |
| H | -3.73188000 | -0.51970700 | 0.09875300  |
| O | -0.38593600 | -0.99956200 | -0.70128100 |
| O | -3.01595100 | 0.04039000  | -0.21365600 |
| H | -2.28550500 | -0.56219500 | -0.42727400 |

Int19

|   |             |             |             |
|---|-------------|-------------|-------------|
| P | -2.00088000 | 0.18948000  | 0.07754400  |
| C | -2.92570000 | -0.44353700 | -1.34486200 |
| H | -2.68699600 | 0.16047200  | -2.22116000 |
| H | -2.67405500 | -1.48855200 | -1.53051700 |
| H | -3.99218500 | -0.34762600 | -1.13104100 |
| C | -2.18856600 | -0.95292100 | 1.46525400  |
| H | -1.61357900 | -0.57091700 | 2.30895400  |
| H | -3.24216300 | -1.00142700 | 1.74825000  |
| H | -1.81391400 | -1.93880100 | 1.17909500  |
| H | -0.68043800 | 2.78530100  | 0.21942800  |
| O | 0.13487100  | 3.29221300  | 0.04430900  |
| H | -0.15116300 | 4.20830800  | -0.00842200 |
| P | 2.00096900  | -0.18960700 | -0.07732600 |
| C | 2.18885700  | 0.95271200  | -1.46508700 |
| H | 1.61414600  | 0.57056600  | -2.30891000 |
| H | 1.81399600  | 1.93858300  | -1.17915600 |
| H | 3.24252200  | 1.00134700  | -1.74781000 |
| C | 2.92610500  | 0.44328900  | 1.34492200  |
| H | 2.68753200  | -0.16062000 | 2.22132100  |
| H | 3.99253100  | 0.34725000  | 1.13086400  |
| H | 2.67464700  | 1.48835200  | 1.53057200  |
| O | -2.20389900 | 1.63498100  | 0.40006600  |
| O | -0.48078600 | -0.14647800 | -0.53572300 |
| O | 0.48100100  | 0.14669400  | 0.53598500  |
| O | 2.20364200  | -1.63515800 | -0.39984700 |
| O | -0.13563200 | -3.29161300 | -0.04522600 |
| H | 0.15011300  | -4.20781600 | 0.00724000  |
| H | 0.67991100  | -2.78488300 | -0.21985500 |

TS17-20

|   |             |             |             |
|---|-------------|-------------|-------------|
| P | 0.30042000  | 0.05915400  | -0.00062100 |
| C | 1.13178200  | -0.58210600 | 1.48806200  |
| H | 1.90108900  | 0.11365100  | 1.82470200  |
| H | 0.37935500  | -0.70833600 | 2.26698300  |
| H | 1.56949400  | -1.55435400 | 1.27036000  |
| C | 0.94400300  | 1.78879900  | -0.09603100 |
| H | 2.03706800  | 1.81432200  | -0.12712800 |
| H | 0.54324900  | 2.29624600  | -0.97695600 |
| H | 0.61126000  | 2.34266800  | 0.78434400  |
| O | -0.68994900 | -1.75086400 | 0.07959200  |
| H | -1.14491600 | -1.89486500 | -0.76266000 |
| O | 1.01355100  | -0.56249400 | -1.34709500 |
| H | 1.40418000  | 0.12497900  | -1.89811300 |
| O | -1.22402800 | 0.32317600  | -0.01021200 |

Int20

|   |             |             |             |
|---|-------------|-------------|-------------|
| P | 0.02448900  | -0.02018600 | -0.03576400 |
| C | -0.20122500 | 1.78188800  | 0.19827500  |
| H | -0.71815300 | 1.95133400  | 1.14325000  |
| H | 0.75194100  | 2.30859100  | 0.19296300  |
| H | -0.83762900 | 2.15288100  | -0.60561600 |
| C | 1.90439000  | -0.05369400 | -0.18547800 |
| H | 2.36533100  | 0.40223500  | 0.69731000  |
| H | 2.27924400  | -1.07368500 | -0.30072000 |
| H | 2.21650000  | 0.51751000  | -1.06197000 |
| O | -1.75621500 | -0.17045100 | -0.08784900 |
| H | -2.04134200 | -1.06679600 | 0.13260400  |
| O | -0.02244000 | -0.89234400 | 1.37536000  |
| H | 0.85384200  | -1.17055600 | 1.66242600  |
| O | -0.15335100 | -0.69819100 | -1.46258200 |

TS20-18

|   |             |             |             |
|---|-------------|-------------|-------------|
| P | 0.03160100  | 0.17207900  | -0.44746500 |
| C | -0.35636200 | 1.81051000  | 0.22425500  |
| H | 0.51589600  | 2.45586800  | 0.10252700  |
| H | -1.18006500 | 2.22135100  | -0.36246300 |
| H | -0.62670300 | 1.72490200  | 1.27280600  |
| C | 1.80023100  | -0.32774100 | -0.32740700 |
| H | 2.19963400  | 0.07844200  | 0.60055200  |
| H | 1.82595800  | -1.41731100 | -0.30682500 |
| H | 2.36487500  | 0.03427100  | -1.18746100 |
| O | -1.14845800 | -0.86966000 | -0.35760900 |
| H | -1.02620700 | -1.04098800 | 0.70183600  |
| O | -0.13489300 | -0.55314800 | 1.69135000  |
| H | 0.46326200  | -1.19638300 | 2.08586500  |
| O | 0.13691000  | 0.42713300  | -2.04865200 |

Int21

|   |             |             |             |
|---|-------------|-------------|-------------|
| P | 0.90320500  | -0.00002600 | -0.09819200 |
| C | 1.97526700  | -1.45893300 | 0.01207800  |
| H | 1.34753900  | -2.35144200 | -0.00184900 |
| H | 2.64637300  | -1.48502600 | -0.84863000 |
| H | 2.55892800  | -1.44444700 | 0.93442700  |
| C | 1.97397700  | 1.45983100  | 0.01227300  |
| H | 1.34535200  | 2.35174400  | 0.00098300  |
| H | 2.55941500  | 1.44452500  | 0.93349200  |
| H | 2.64340900  | 1.48790400  | -0.84966800 |
| O | 0.12018000  | -0.00059000 | 1.33164500  |
| H | -0.84991400 | -0.00028600 | 1.22685900  |
| O | -0.01160100 | -0.00031500 | -1.28663500 |
| S | -3.02256500 | -0.00003000 | 0.02825900  |
| H | -2.00223300 | -0.00023100 | -0.88106400 |

TS21-22



|   |             |             |             |
|---|-------------|-------------|-------------|
| P | 0.76760200  | -0.11180900 | -0.03764200 |
| C | 2.03430600  | -0.24745600 | -1.34733100 |
| H | 1.57001900  | 0.00532200  | -2.30103100 |
| H | 2.82967800  | 0.47007300  | -1.13325100 |
| H | 2.44491500  | -1.25664300 | -1.39561100 |
| C | 1.56701100  | -0.59053200 | 1.52493300  |
| H | 0.81008300  | -0.59563700 | 2.31128900  |
| H | 2.00700100  | -1.58636400 | 1.44524000  |
| H | 2.33815800  | 0.13711800  | 1.78519900  |
| O | -0.24890600 | -1.28762300 | -0.41880800 |
| H | -1.74452900 | -0.85978800 | -0.56008100 |
| O | 0.14035100  | 1.25828600  | 0.04222400  |
| S | -2.59790800 | -0.22584100 | 0.35953000  |
| H | -1.78996400 | 0.88084700  | 0.28343100  |

Int22

|   |             |             |             |
|---|-------------|-------------|-------------|
| P | -1.09551900 | -0.05366900 | 0.03891700  |
| C | -2.82639800 | -0.21585100 | -0.45292700 |
| H | -3.07223700 | -1.27721000 | -0.50592700 |
| H | -3.47635400 | 0.26986900  | 0.27899500  |
| H | -2.98509000 | 0.24174900  | -1.43238600 |
| C | -0.69401800 | 1.70500500  | 0.12157000  |
| H | 0.35797500  | 1.80539600  | 0.39397200  |
| H | -0.86165600 | 2.17726900  | -0.84959400 |
| H | -1.31467100 | 2.20033000  | 0.87241100  |
| O | -0.14835300 | -0.82940600 | -0.90698700 |
| H | 2.07115400  | -0.54462900 | -0.55649100 |
| O | -0.80860800 | -0.77583000 | 1.38458400  |
| S | 3.21113500  | 0.02647800  | -0.10676200 |
| H | 3.11369000  | -0.58441900 | 1.09083200  |

Int23

|   |             |             |             |
|---|-------------|-------------|-------------|
| P | -0.00361800 | -2.02746200 | 0.04550700  |
| C | 0.96517500  | -2.84878600 | -1.24689200 |
| H | 0.49644900  | -2.66267500 | -2.21405600 |
| H | 1.99529000  | -2.49050600 | -1.25591500 |
| H | 0.94836000  | -3.92282200 | -1.05032500 |
| C | 0.88503700  | -2.13417900 | 1.61835200  |
| H | 0.35974700  | -1.52764500 | 2.35640100  |
| H | 0.88473800  | -3.17377000 | 1.95192600  |
| H | 1.90818500  | -1.77106800 | 1.50388000  |
| H | -3.06660700 | -1.14146400 | 0.07518500  |
| S | -4.01175600 | -0.16569800 | 0.06010900  |
| H | -4.72764200 | -0.75694500 | -0.91612500 |
| P | 0.00411500  | 2.02760600  | -0.04563400 |
| C | -0.88723500 | 2.13166400  | -1.61712400 |
| H | -0.36217500 | 1.52541600  | -2.35557000 |
| H | -1.90957200 | 1.76694500  | -1.50048000 |
| H | -0.88926600 | 3.17099100  | -1.95150500 |
| C | -0.96404600 | 2.84837600  | 1.24759100  |
| H | -0.49398100 | 2.66322000  | 2.21428800  |
| H | -0.94869000 | 3.92234500  | 1.05053300  |
| H | -1.99373500 | 2.48889700  | 1.25789100  |
| O | -1.44501800 | -2.40288800 | 0.11316400  |
| O | 0.28886700  | -0.46306600 | -0.49206300 |
| O | -0.28506300 | 0.46317100  | 0.49369600  |
| O | 1.44484000  | 2.40513000  | -0.11581800 |
| S | 4.00977200  | 0.16568400  | -0.06001100 |
| H | 4.73419000  | 0.76275700  | 0.90630900  |
| H | 3.06639700  | 1.14316300  | -0.07548400 |
